# Supplementary material for: Reactivity of electrophilic µ-phosphinidene complexes with heterocumulenes: formation of the first σ-π-aminophosphaimine complexes [Mn2(CO)8{µ-η1,η2-P(NiPr2)NR}] and diazoalkane insertions into metal–phosphorus bonds
Source: Royal Society of Chemistry journal article supplement (doi:10.1039/b505472a), 2005-01-01
Supplement: b505472a.pdf [file b505472a.pdf]

# Supplementary Material (ESI) for Chemical Communications  
# This journal is © The Royal Society of Chemistry 2005

Supplementary Information (ESI) for Chemical Communications

This journal is © The Royal Society of Chemistry 2005

**Reactivity of Electrophilic  $\mu_2$ -Phosphinidene Complexes with  
Heterocumulenes: Formation of the First  $\sigma$ - $\pi$ -Aminophosphimine  
Complexes  $[\text{Mn}_2(\text{CO})_8\{\mu\text{-}\eta^1, \eta^2\text{-P}(\text{N}^i\text{Pr}_2)=\text{NR}\}]$  and Diazoalkane  
Insertions into Metal-Phosphorus Bonds.**

Todd W. Graham, Konstantin A. Udachin and Arthur J. Carty\*

Steacie Institute for Molecular Sciences, National Research Council of Canada, 100  
Sussex Drive, Ottawa, Ontario, Canada K1A 0R6 and The Ottawa-Carleton Chemistry  
Institute, University of Ottawa, Ottawa, Ontario, Canada K1N 6N5

## Experimental

**General comments:** All procedures were carried out using standard Schlenk techniques or in a glovebox under a nitrogen atmosphere. THF was distilled from Na/benzophenone. Dichloromethane and hexane were purified using solvent purification columns containing alumina (dichloromethane) or alumina and copper catalyst (hexane). Deuterated chloroform was vacuum distilled from AlCl<sub>3</sub> and then CaH<sub>2</sub>. C<sub>6</sub>D<sub>6</sub> was vacuum distilled from Na/benzophenone. NMR spectra were recorded at 400 MHz (<sup>1</sup>H) or 161.975 (<sup>31</sup>P{<sup>1</sup>H}). Cl<sub>2</sub>PN<sup>*i*</sup>Pr<sub>2</sub> was prepared according to the literature procedure.<sup>1</sup> Mn<sub>2</sub>(CO)<sub>10</sub> and Co<sub>2</sub>(CO)<sub>8</sub> were obtained from Strem Chemicals. All other reagents were obtained from Aldrich and were used as received.

a) [**Mn<sub>2</sub>(CO)<sub>8</sub>(μ-PN<sup>*i*</sup>Pr<sub>2</sub>)**] (**1**): 2.067 g (5.300 mmol) of Mn<sub>2</sub>(CO)<sub>10</sub> was added slowly to 1.900 g (14.054 mmol) of KC<sub>8</sub> in 20 mL of THF. The mixture was stirred for two hours and then was filtered through Celite. The solution was added dropwise via cannula to 1.070 g (5.300 mmol) of Cl<sub>2</sub>PN<sup>*i*</sup>Pr<sub>2</sub> in 20 mL of THF at –80 °C. After warming to room temperature the solution was stirred for 2 h and the solvent was then removed in vacuo. The residue was extracted repeatedly with ether (ca. 200 mL); the extracts were filtered through Celite and the solution was concentrated to ca. 40 mL and cooled to –45 °C overnight. The solvent was then decanted and the red crystalline solid was dried in vacuo. Yield: 47 %. <sup>1</sup>H NMR (δ, C<sub>6</sub>D<sub>6</sub>, 25 °C): 4.09 (sept, <sup>3</sup>J<sub>HH</sub> = 6.6 Hz, 2H, CH(CH<sub>3</sub>)<sub>2</sub>); 0.92 (d, <sup>3</sup>J<sub>HH</sub> = 6.6 Hz, 12 H, CH(CH<sub>3</sub>)<sub>2</sub>). <sup>31</sup>P NMR (δ, C<sub>6</sub>D<sub>6</sub>, 25 °C): 731. IR (ν<sub>CO</sub>, cm<sup>-1</sup>, ether): 2073 (m); 2016(s); 1989 (s); 1959 (m); 1942 (s). Anal. Calcd. for C<sub>14</sub>H<sub>14</sub>NO<sub>8</sub>PMn<sub>2</sub>: C, 36.2; H, 3.0; N, 3.0. Found: C, 35.9; H, 3.0; N, 3.0.

b) [**Co<sub>2</sub>(CO)<sub>4</sub>(μ-dppm)(μ-PN<sup>*i*</sup>Pr<sub>2</sub>)**] (**2a**): Solid Co<sub>2</sub>(CO)<sub>8</sub> (3.044 g, 8.902 mmol) was added slowly to a suspension of 3.500 g (25.906 mmol) of KC<sub>8</sub> in 50 mL of THF. The mixture was stirred for 2 h and was then filtered through Celite. The solution was added dropwise at –15 to –10 °C to a THF solution of 1.798 g (8.898 mmol) Cl<sub>2</sub>PN<sup>*i*</sup>Pr<sub>2</sub> and 3.422 g (8.902 mmol) of dppm. The mixture was warmed to room temperature, stirred for 1 h and then the solvent was removed in vacuo. The solid was extracted into 40 mL of a 1:1 mixture of ether and hexane; the extracts were filtered through Celite and then the solvent volume was decreased to approximately 20 mL. After cooling to –45 °C overnight large brown crystals of **2a** had formed which were isolated by decanting the

solvent. Yield: 50 %.  $^1\text{H}$  NMR ( $\delta$ ,  $\text{C}_6\text{D}_6$ , 25 °C): 7.52-6.93 (br, m, 20H,  $\text{Ph}_2\text{PCH}_2\text{PPh}_2$ ); 4.18 (br, s, 2H,  $\text{Ph}_2\text{PCH}_2\text{PPh}_2$  or  $\text{CH}(\text{CH}_3)_2$ ), 4.01 (br, s, 2H,  $\text{Ph}_2\text{PCH}_2\text{PPh}_2$  or  $\text{CH}(\text{CH}_3)_2$ ); 1.19 (br, s, 12H,  $\text{CH}(\text{CH}_3)_2$ ).  $^{31}\text{P}$  NMR ( $\delta$ ,  $\text{C}_6\text{D}_6$ , 25 °C): 578 (br, s); 42 (d,  $^2J_{\text{PP}} = 55.9$  Hz). IR ( $\nu_{\text{CO}}$ ,  $\text{cm}^{-1}$ , ether): Anal. Calcd. For  $\text{C}_{35}\text{H}_{30}\text{NO}_4\text{P}_3\text{Co}_2$ : C, 56.9; H, 4.1; N 1.9. Found: C, 56.6; H, 3.8; N, 1.8.

c)  $[\text{Mn}_2(\text{CO})_8(\mu, \eta^1, \eta^2\text{-P}(\text{N}^i\text{Pr}_2)=\text{N-R})]$  (R =  $\text{SiMe}_3$  (**3a**);  $\text{SnMe}_3$  (**3b**); Ph (**3c**); adamantyl (**3d**)): These compounds were prepared in a similar manner and only the synthesis of **3a** is described. 100  $\mu\text{L}$  (0.754 mmol) of azidotrimethylsilane was added to a suspension of 351 mg (0.755 mmol) of  $[\text{Mn}_2(\text{CO})_8(\mu\text{-PN}^i\text{Pr}_2)]$  in 5 mL of ether. The mixture was stirred overnight and then the solvent was removed in vacuo. The residue was extracted into a minimum volume of ether, filtered and then cooled to  $-45$  °C overnight resulting in the formation of a red crystalline solid. **3a** (R =  $\text{SiMe}_3$ ): Yield 69 %.  $^1\text{H}$  NMR ( $\delta$ ,  $\text{CDCl}_3$ , 25 °C): 4.33 (s, br, 2H,  $\text{CH}(\text{CH}_3)_2$ ); 1.48 (s, br, 12H,  $\text{CH}(\text{CH}_3)_2$ ); 0.18 (s, br, 9H,  $\text{Si}(\text{CH}_3)_3$ ).  $^{31}\text{P}$  NMR ( $\delta$ ,  $\text{CDCl}_3$ , 25 °C): 216. IR ( $\nu_{\text{CO}}$ ,  $\text{cm}^{-1}$ , ether): 2075 (m); 2024 (s); 2018 (s), 1989 (s); 1974 (s), 1962 (s), 1943 (m). Anal. Calcd. for  $\text{C}_{17}\text{H}_{25}\text{N}_2\text{O}_8\text{PSiMn}_2$ : C, 36.8; H, 4.5; N, 5.1. Found: C, 36.6; H, 4.0; N, 4.7. Mass spectrum: Calcd.  $\text{M}^+$   $m/z = 554.3$ ; found  $m/z = 554.4$ . **3b** (R =  $\text{SnMe}_3$ ): Yield 75 %.  $^1\text{H}$  NMR ( $\delta$ ,  $\text{C}_6\text{D}_6$ , 25 °C): 3.93 (sept.,  $^3J_{\text{HH}} = 6.7$  Hz, 2H,  $\text{CH}(\text{CH}_3)_2$ ); 1.02 (d,  $^3J_{\text{HH}} = 6.7$  Hz, 12H,  $\text{CH}(\text{CH}_3)_2$ ); 0.18 (pseudotriplet,  $^2J_{\text{SnH}} = 55.2$  Hz, 9H,  $\text{Sn}(\text{CH}_3)_3$ ).  $^{31}\text{P}$  NMR ( $\delta$ ,  $\text{C}_6\text{D}_6$ , 25 °C): 220. IR ( $\nu_{\text{CO}}$ ,  $\text{cm}^{-1}$ , ether): 2070 (m); 2017 (s); 1982 (s); 1966 (s); 1955 (m); 1935 (m). Anal. Calcd. for  $\text{C}_{17}\text{H}_{23}\text{N}_2\text{O}_8\text{SnMn}_2$ : C, 31.8; H, 3.6; N, 4.4. Found: 31.9; H, 3.6; N, 4.4. **3c** (R = Ph): Yield: 70 %.  $^1\text{H}$  NMR ( $\delta$ ,  $\text{C}_6\text{D}_6$ , 25 °C): 6.93 (m, 2H,  $\text{C}_6\text{H}_5$ ); 6.73 (m, 3H,  $\text{C}_6\text{H}_5$ ); 3.41 (sept.,  $^3J_{\text{HH}} = 6.9$  Hz, 2H,  $\text{CH}(\text{CH}_3)_2$ ); 0.82 (d,  $^3J_{\text{HH}} = 6.9$  Hz, 12H,  $\text{CH}(\text{CH}_3)_2$ ).  $^{31}\text{P}$  NMR ( $\delta$ ,  $\text{C}_6\text{D}_6$ , 25 °C): 197. IR ( $\nu_{\text{CO}}$ ,  $\text{cm}^{-1}$ , ether): 2078 (m); 2029 (s); 1992 (s); 1977 (s); 1963 (s); 1942 (m). Anal. Calcd. for  $\text{C}_{20}\text{H}_{19}\text{N}_2\text{O}_8\text{PMn}_2$ : C, 43.2; H, 3.4; N, 5.0. Found: C, 43.0; H, 3.6; N, 4.6. **3d** (R = adamantyl): Note – reaction mixture stirred in THF for four days. Yield 75 %.  $^1\text{H}$  NMR ( $\delta$ ,  $\text{C}_6\text{D}_6$ , 25 °C). 3.31 (sept.,  $^3J_{\text{HH}} = 6.5$  Hz,  $\text{CH}(\text{CH}_3)_2$ ); 1.94-1.91 (m, 6H,  $\text{CH}_2$ ); 1.45 (s, 6H,  $\text{CH}_2$ ); 0.99 (br s, 12H,  $\text{CH}(\text{CH}_3)_2$ ).  $^{31}\text{P}$  NMR ( $\delta$ ,  $\text{C}_6\text{D}_6$ , 25 °C): 155. Anal. Calcd. for  $\text{C}_{24}\text{H}_{27}\text{N}_2\text{O}_8\text{PMn}_2$ :

# Supplementary Material (ESI) for Chemical Communications  
# This journal is © The Royal Society of Chemistry 2005

C, 47.1; H, 4.4; N, 4.6. Found: C, 47.2; H, 4.9; N, 4.8. Mass spectrum: Calcd.  $M^+$   $m/z$  = 612.3; found  $m/z$  = 612.0.

d) [ $\text{Co}_2(\text{CO})_4(\mu, \eta^1-\eta^2-\text{P}(\text{NR}_2)=\text{CH}_2)(\mu\text{-dppm})$ ] ( $\text{NR}_2 = \text{N}^i\text{Pr}_2$  (**4a**), TMP (**4b**)): These complexes were prepared in a similar manner and only the synthesis of **4a** is described. Diazomethane was generated by adding three drops of 6.0 M aqueous KOH to a methanol suspension of 300 mg (1.400 mmol) of Diazald. The diazomethane vapor was passed through a solution of 300 mg (0.402 mmol) [ $\text{Co}_2(\text{CO})_2(\mu\text{-dppm})(\mu\text{-PN}^i\text{Pr}_2)$ ] in 10 ml of THF at  $-80$  °C and the mixture was then stirred at room temperature for 20 minutes. The solvent was removed in vacuo and the residue was then extracted with hexane (ca.  $5 \times 5$  ml). The hexane extracts were filtered through Celite and concentrated in vacuo to ca. 2 ml and then cooled to  $-45$  °C overnight, resulting in the formation of a brown crystalline powder. Analytically pure material was obtained by recrystallization from ether at  $-45$  °C. **4a**: Yield: 45 %.  $^1\text{H}$  NMR ( $\delta$ ,  $\text{CDCl}_3$ , 25 °C): 7.70-7.12 (m, 20 H,  $\text{C}_6\text{H}_5$ ); 4.20 (dt,  $^2J_{\text{HH}} = 14.0$  Hz,  $^2J_{\text{PH}} = 9.8$  Hz, 1H,  $\text{Ph}_2\text{PCH}_2\text{PPh}_2$ ); 3.89 (sept.,  $^3J_{\text{HH}} = 6.7$  Hz, 2H,  $\text{CH}(\text{CH}_3)_2$ ); 3.73 (dt,  $^2J_{\text{HH}} = 14.1$  Hz,  $^2J_{\text{PH}} = 9.4$  Hz, 1H,  $\text{Ph}_2\text{PCH}_2\text{PPh}_2$ ); 2.01 (dd,  $^2J_{\text{HH}} = 5.9$  Hz,  $J_{\text{HP}} = 10.8$  Hz, 1H,  $=\text{CHH}$ ); 1.41 (d,  $^3J_{\text{HH}} = 6.7$  Hz, 6H,  $\text{CH}(\text{CH}_3)_2$ ); 1.27 (d,  $^3J_{\text{HH}} = 6.7$  Hz, 6H,  $\text{CH}(\text{CH}_3)_2$ ), 0.71 (ddd,  $^2J_{\text{HH}} = 5.9$  Hz,  $^2J_{\text{PH}} = 15.4$  Hz,  $^3J_{\text{PH}} = 20.2$  Hz, 1H,  $=\text{CHH}$ ).  $^{31}\text{P}$  NMR ( $\delta$ ,  $\text{CDCl}_3$ , 25 °C): 247 (m); 46 (m), 38 (m).  $^{13}\text{C}$  NMR ( $\delta$ ,  $\text{CDCl}_3$ , 25 °C): 133.6 (d,  $J_{\text{PC}} = 13.7$  Hz,  $\text{C}_6\text{H}_5$ ); 132.3 (d,  $J_{\text{PC}} = 12.2$  Hz,  $\text{C}_6\text{H}_5$ ); 132.1 (d,  $J_{\text{PC}} = 12.1$  Hz,  $\text{C}_6\text{H}_5$ ); 131.5 (d,  $J_{\text{PC}} = 11.4$  Hz,  $\text{C}_6\text{H}_5$ ); 130.0 (d,  $J_{\text{PC}} = 39.4$  Hz,  $\text{C}_6\text{H}_5$ ); 129.5 (d,  $J_{\text{PC}} = 25.6$  Hz,  $\text{C}_6\text{H}_5$ ); 128.6 (s,  $\text{C}_6\text{H}_5$ ); 128.5 (s,  $\text{C}_6\text{H}_5$ ); 128.4 (s,  $\text{C}_6\text{H}_5$ ); 128.3 (s,  $\text{C}_6\text{H}_5$ ); 50.3 (s,  $\text{CH}(\text{CH}_3)_2$ ); 24.0 (br,  $\text{P}=\text{CH}_2$ ); 22.3 (s,  $\text{CH}(\text{CH}_3)_2$ ). IR ( $\nu_{\text{CO}}$ ,  $\text{cm}^{-1}$ , ether): 1995 (s); 1958 (s); 1945 (s); 1906 (s). Anal. Calcd. for  $\text{C}_{36}\text{H}_{41}\text{NO}_4\text{P}_3\text{Co}_2$ : C, 56.7; H, 5.4; N, 1.3. Found: C, 56.9; H, 5.1; N, 1.6. Yield: **4b**: Yield: 52 %.  $^1\text{H}$  NMR ( $\delta$ ,  $\text{CDCl}_3$ , 25 °C): 7.76-7.09 (m, 20H,  $\text{C}_6\text{H}_5$ ); 4.02 (dt,  $^2J_{\text{HH}} = 14.2$  Hz,  $^2J_{\text{PH}} = 9.9$  Hz, 1H,  $\text{Ph}_2\text{CH}_2\text{Ph}_2$ ); 3.62 (dt,  $^2J_{\text{HH}} = 14.4$  Hz,  $^2J_{\text{PH}} = 9.5$  Hz, 1H,  $\text{Ph}_2\text{CH}_2\text{Ph}_2$ ); 1.80-1.66 (m, 13H,  $\text{CH}_3/\text{CH}_2$  of TMP and  $=\text{CHH}$ ); 0.52 (ddd,  $^2J_{\text{HH}} = 5.3$  Hz,  $^2J_{\text{PH}} = 14.3$  Hz,  $^3J_{\text{PH}} = 25.6$  Hz, 1H,  $\text{Ph}_2\text{CH}_2\text{Ph}_2$ ).  $^{31}\text{P}$  NMR ( $\delta$ ,  $\text{CDCl}_3$ , 25 °C): 228 (m), 51 (m), 42 (m).  $^{13}\text{C}$  NMR ( $\delta$ ,  $\text{CDCl}_3$ , 25 °C): 133.8 (d,  $J_{\text{PC}} = 13.4$  Hz,  $\text{C}_6\text{H}_5$ ); 132.0 (d,  $J_{\text{PC}} = 12.3$  Hz,  $\text{C}_6\text{H}_5$ ); 131.5 (d,  $J_{\text{PC}} = 11.3$  Hz,  $\text{C}_6\text{H}_5$ ); 130.0 (d,  $J_{\text{PC}} = 34.1$  Hz,  $\text{C}_6\text{H}_5$ ); 129.5 (d,  $J_{\text{PC}} = 32.5$  Hz,  $\text{C}_6\text{H}_5$ );

# Supplementary Material (ESI) for Chemical Communications  
# This journal is © The Royal Society of Chemistry 2005

128.8 (s, C<sub>6</sub>H<sub>5</sub>); 128.7 (s, C<sub>6</sub>H<sub>5</sub>); 128.6 (s, C<sub>6</sub>H<sub>5</sub>); 128.4 (s, C<sub>6</sub>H<sub>5</sub>); 59.0 (s, CH<sub>2</sub>); 41.6 (s, CH<sub>2</sub>); 31.7 (s, =CH<sub>2</sub>); 17.5 (s, CH<sub>3</sub>). IR (ν<sub>CO</sub>, cm<sup>-1</sup>, ether): 1985 (s); 1968 (s); 1955 (sh), 1900 (s). Anal. Calcd. for C<sub>40</sub>H<sub>45</sub>NO<sub>4</sub>P<sub>3</sub>Co<sub>2</sub>: C, 59.0; H, 5.6; N, 1.7. Found: C, 58.8; H, 5.3; N, 1.6.

e) [Mn<sub>2</sub>(CO)<sub>8</sub>(μ,η<sup>2</sup>-P(N<sup>i</sup>Pr<sub>2</sub>)=N-N=CPh<sub>2</sub>)] (5): 125 mg (0.645 mmol) of diphenyldiazomethane in 2 mL of THF was added at -45 °C to 300 mg (0.645 mmol) [Mn<sub>2</sub>(CO)<sub>8</sub>(μ-PN<sup>i</sup>Pr<sub>2</sub>)] in 2 mL of THF. The mixture was kept at -45 °C for one hour and then was stirred at room temperature for one hour. The solvent was removed in vacuo and the solid was crystallized from a minimum volume of ether at -45 °C. Yield: 60 %. <sup>1</sup>H NMR (δ, C<sub>6</sub>D<sub>6</sub>, 25 °C): 7.85 (m, 2H, C<sub>6</sub>H<sub>5</sub>); 7.10-6.93 (m, 8H, C<sub>6</sub>H<sub>5</sub>); 3.73 (sept., <sup>3</sup>J<sub>HH</sub> = 6.9 Hz, 2H, CH(CH<sub>3</sub>)<sub>2</sub>); 3.25 (q, <sup>3</sup>J<sub>HH</sub> = 7.0 Hz, O(CH<sub>2</sub>CH<sub>3</sub>)<sub>2</sub>); 1.20 (d, <sup>3</sup>J<sub>HH</sub> = 6.9 Hz, 6H, CH(CH<sub>3</sub>)<sub>2</sub>); 1.15 (t, <sup>3</sup>J<sub>HH</sub> = 7.0 Hz, O(CH<sub>2</sub>CH<sub>3</sub>)<sub>2</sub>); 1.00 (d, <sup>3</sup>J<sub>HH</sub> = 6.9 Hz, 6H, CH(CH<sub>3</sub>)<sub>2</sub>). <sup>31</sup>P NMR (δ, C<sub>6</sub>D<sub>6</sub>, 25 °C): 285. IR (ν<sub>CO</sub>, cm<sup>-1</sup>, ether): 2084 (w); 2009 (s); 1965 (m); 1921 (m); 1906 (m). Note: this complex has a variable amount of co-crystallised ether and a proper elemental analysis could not be obtained. Mass spectrum: Calcd. M<sup>+</sup> m/z = 659.4; found m/z = 660.1.

## References

1. R. B. King, N. D. Sadanani *Synth. React. Inorg. Met.-Org. Chem.* **1985**, *15*(2), 149.

Crystallographic Data for Compounds **1**, **3a**, **3c**, **4b**, **5**.

Table 1. Atomic coordinates ( $\times 10^4$ ) and equivalent isotropic displacement parameters ( $\text{\AA}^2 \times 10^3$ ) for  $[\text{Mn}_2(\text{CO})_8(\mu\text{-PN}^t\text{Pr}_2)]$  (**1**).  $U(\text{eq})$  is defined as one third of the trace of the orthogonalized  $U^{ij}$  tensor.

|       | x        | y        | z       | U(eq) |
|-------|----------|----------|---------|-------|
| Mn(1) | 2987(1)  | 7284(1)  | 1548(1) | 20(1) |
| Mn(2) | 2536(1)  | 8421(1)  | 3442(1) | 21(1) |
| P(1)  | 1682(1)  | 6293(1)  | 2505(1) | 19(1) |
| N(1)  | 1210(2)  | 4568(1)  | 2495(1) | 23(1) |
| O(1)  | 6782(2)  | 6193(1)  | 2115(1) | 31(1) |
| O(2)  | 5413(2)  | 9970(1)  | 1303(1) | 52(1) |
| O(3)  | -843(2)  | 8271(1)  | 884(1)  | 37(1) |
| O(4)  | 2589(2)  | 5156(1)  | -237(1) | 40(1) |
| O(5)  | 6440(2)  | 7637(1)  | 4187(1) | 36(1) |
| O(6)  | 1084(2)  | 8553(1)  | 5197(1) | 39(1) |
| O(7)  | 4849(2)  | 11363(1) | 3534(1) | 49(1) |
| O(8)  | -1255(2) | 9541(1)  | 2876(1) | 34(1) |
| C(1)  | 5344(2)  | 6630(1)  | 1902(1) | 24(1) |
| C(2)  | 4499(2)  | 8955(2)  | 1411(1) | 32(1) |
| C(3)  | 595(2)   | 7907(1)  | 1164(1) | 26(1) |
| C(4)  | 2753(2)  | 5996(2)  | 454(1)  | 27(1) |
| C(5)  | 4948(2)  | 7914(1)  | 3887(1) | 26(1) |
| C(6)  | 1661(2)  | 8519(1)  | 4523(1) | 28(1) |
| C(7)  | 3969(2)  | 10236(2) | 3501(1) | 32(1) |
| C(8)  | 170(2)   | 9079(1)  | 3068(1) | 26(1) |
| C(9)  | 874(2)   | 4016(2)  | 3297(1) | 30(1) |
| C(10) | 2726(2)  | 4509(2)  | 4038(1) | 35(1) |
| C(11) | -1089(2) | 4403(2)  | 3634(1) | 38(1) |
| C(12) | 1033(2)  | 3421(1)  | 1606(1) | 27(1) |
| C(13) | -1013(2) | 2407(2)  | 1385(1) | 38(1) |
| C(14) | 2831(2)  | 2603(2)  | 1603(1) | 41(1) |

Table 2. Bond lengths [Å] and angles [°] for [Mn<sub>2</sub>(CO)<sub>8</sub>(μ-PN<sup>t</sup>Pr<sub>2</sub>)] (1).

---

|                 |            |
|-----------------|------------|
| Mn(1)-C(4)      | 1.7990(13) |
| Mn(1)-C(1)      | 1.8391(12) |
| Mn(1)-C(2)      | 1.8405(14) |
| Mn(1)-C(3)      | 1.8570(13) |
| Mn(1)-P(1)      | 2.1439(4)  |
| Mn(1)-Mn(2)     | 2.9193(4)  |
| Mn(2)-C(6)      | 1.8139(14) |
| Mn(2)-C(7)      | 1.8369(14) |
| Mn(2)-C(5)      | 1.8443(13) |
| Mn(2)-C(8)      | 1.8547(13) |
| Mn(2)-P(1)      | 2.1376(4)  |
| P(1)-N(1)       | 1.6242(10) |
| N(1)-C(9)       | 1.4886(15) |
| N(1)-C(12)      | 1.5069(16) |
| O(1)-C(1)       | 1.1394(15) |
| O(2)-C(2)       | 1.1318(17) |
| O(3)-C(3)       | 1.1364(16) |
| O(4)-C(4)       | 1.1470(17) |
| O(5)-C(5)       | 1.1384(16) |
| O(6)-C(6)       | 1.1445(17) |
| O(7)-C(7)       | 1.1395(18) |
| O(8)-C(8)       | 1.1371(16) |
| C(9)-C(10)      | 1.5195(19) |
| C(9)-C(11)      | 1.5195(19) |
| C(12)-C(14)     | 1.5116(18) |
| C(12)-C(13)     | 1.5157(19) |
| <hr/>           |            |
| C(4)-Mn(1)-C(1) | 89.07(6)   |
| C(4)-Mn(1)-C(2) | 103.24(6)  |
| C(1)-Mn(1)-C(2) | 90.51(6)   |
| C(4)-Mn(1)-C(3) | 89.50(6)   |
| C(1)-Mn(1)-C(3) | 178.57(5)  |
| C(2)-Mn(1)-C(3) | 89.98(6)   |

# Supplementary Material (ESI) for Chemical Communications  
# This journal is © The Royal Society of Chemistry 2005

|                  |            |
|------------------|------------|
| C(4)-Mn(1)-P(1)  | 112.07(4)  |
| C(1)-Mn(1)-P(1)  | 85.86(4)   |
| C(2)-Mn(1)-P(1)  | 144.41(5)  |
| C(3)-Mn(1)-P(1)  | 94.53(4)   |
| C(4)-Mn(1)-Mn(2) | 158.96(4)  |
| C(1)-Mn(1)-Mn(2) | 90.04(4)   |
| C(2)-Mn(1)-Mn(2) | 97.78(5)   |
| C(3)-Mn(1)-Mn(2) | 91.23(4)   |
| P(1)-Mn(1)-Mn(2) | 46.922(10) |
| C(6)-Mn(2)-C(7)  | 107.85(6)  |
| C(6)-Mn(2)-C(5)  | 89.64(6)   |
| C(7)-Mn(2)-C(5)  | 88.37(6)   |
| C(6)-Mn(2)-C(8)  | 88.24(6)   |
| C(7)-Mn(2)-C(8)  | 88.23(6)   |
| C(5)-Mn(2)-C(8)  | 175.25(5)  |
| C(6)-Mn(2)-P(1)  | 113.29(4)  |
| C(7)-Mn(2)-P(1)  | 138.84(5)  |
| C(5)-Mn(2)-P(1)  | 90.91(4)   |
| C(8)-Mn(2)-P(1)  | 93.84(4)   |
| C(6)-Mn(2)-Mn(1) | 159.97(4)  |
| C(7)-Mn(2)-Mn(1) | 91.91(5)   |
| C(5)-Mn(2)-Mn(1) | 94.25(4)   |
| C(8)-Mn(2)-Mn(1) | 89.18(4)   |
| P(1)-Mn(2)-Mn(1) | 47.104(9)  |
| N(1)-P(1)-Mn(2)  | 140.12(4)  |
| N(1)-P(1)-Mn(1)  | 129.61(4)  |
| Mn(2)-P(1)-Mn(1) | 85.974(14) |
| C(9)-N(1)-C(12)  | 116.53(10) |
| C(9)-N(1)-P(1)   | 125.04(9)  |
| C(12)-N(1)-P(1)  | 118.41(8)  |
| O(1)-C(1)-Mn(1)  | 178.46(11) |
| O(2)-C(2)-Mn(1)  | 178.20(16) |
| O(3)-C(3)-Mn(1)  | 176.39(11) |
| O(4)-C(4)-Mn(1)  | 178.81(13) |
| O(5)-C(5)-Mn(2)  | 177.77(12) |



# Supplementary Material (ESI) for Chemical Communications  
# This journal is © The Royal Society of Chemistry 2005

|                   |            |
|-------------------|------------|
| O(6)-C(6)-Mn(2)   | 178.59(13) |
| O(7)-C(7)-Mn(2)   | 179.58(14) |
| O(8)-C(8)-Mn(2)   | 176.51(11) |
| N(1)-C(9)-C(10)   | 111.96(11) |
| N(1)-C(9)-C(11)   | 111.28(10) |
| C(10)-C(9)-C(11)  | 112.93(12) |
| N(1)-C(12)-C(14)  | 110.38(11) |
| N(1)-C(12)-C(13)  | 111.34(11) |
| C(14)-C(12)-C(13) | 112.98(12) |

---

Symmetry transformations used to generate equivalent atoms:

Table 3. Anisotropic displacement parameters ( $\text{\AA}^2 \times 10^3$ ) for  $[\text{Mn}_2(\text{CO})_8(\mu\text{-PN}^i\text{Pr}_2)]$  (**1**). The anisotropic displacement factor exponent takes the form:  $-2\pi^2[ h^2 a^{*2}U^{11} + \dots + 2 h k a^* b^* U^{12} ]$

|       | $U^{11}$ | $U^{22}$ | $U^{33}$ | $U^{23}$ | $U^{13}$ | $U^{12}$ |
|-------|----------|----------|----------|----------|----------|----------|
| Mn(1) | 19(1)    | 19(1)    | 22(1)    | 5(1)     | 4(1)     | 3(1)     |
| Mn(2) | 22(1)    | 19(1)    | 21(1)    | 2(1)     | 1(1)     | 4(1)     |
| P(1)  | 20(1)    | 18(1)    | 20(1)    | 4(1)     | 3(1)     | 3(1)     |
| N(1)  | 23(1)    | 20(1)    | 27(1)    | 7(1)     | 4(1)     | 5(1)     |
| O(1)  | 26(1)    | 36(1)    | 32(1)    | 8(1)     | 4(1)     | 11(1)    |
| O(2)  | 34(1)    | 35(1)    | 100(1)   | 34(1)    | 21(1)    | 6(1)     |
| O(3)  | 34(1)    | 47(1)    | 33(1)    | 12(1)    | 4(1)     | 18(1)    |
| O(4)  | 44(1)    | 44(1)    | 28(1)    | -1(1)    | 7(1)     | 9(1)     |
| O(5)  | 30(1)    | 40(1)    | 37(1)    | 10(1)    | -1(1)    | 11(1)    |
| O(6)  | 44(1)    | 50(1)    | 25(1)    | 6(1)     | 7(1)     | 16(1)    |
| O(7)  | 46(1)    | 27(1)    | 66(1)    | 14(1)    | -11(1)   | -4(1)    |
| O(8)  | 33(1)    | 37(1)    | 32(1)    | 3(1)     | 0(1)     | 15(1)    |
| C(1)  | 25(1)    | 23(1)    | 23(1)    | 4(1)     | 5(1)     | 3(1)     |
| C(2)  | 24(1)    | 28(1)    | 49(1)    | 14(1)    | 10(1)    | 8(1)     |
| C(3)  | 28(1)    | 28(1)    | 23(1)    | 7(1)     | 6(1)     | 6(1)     |
| C(4)  | 26(1)    | 30(1)    | 27(1)    | 8(1)     | 6(1)     | 6(1)     |
| C(5)  | 27(1)    | 25(1)    | 24(1)    | 3(1)     | 3(1)     | 4(1)     |
| C(6)  | 28(1)    | 28(1)    | 24(1)    | 1(1)     | 0(1)     | 8(1)     |
| C(7)  | 30(1)    | 26(1)    | 37(1)    | 6(1)     | -5(1)    | 5(1)     |
| C(8)  | 29(1)    | 23(1)    | 22(1)    | 1(1)     | 3(1)     | 5(1)     |
| C(9)  | 33(1)    | 29(1)    | 31(1)    | 14(1)    | 8(1)     | 6(1)     |
| C(10) | 42(1)    | 39(1)    | 28(1)    | 12(1)    | 5(1)     | 12(1)    |
| C(11) | 37(1)    | 47(1)    | 37(1)    | 19(1)    | 15(1)    | 10(1)    |
| C(12) | 31(1)    | 22(1)    | 27(1)    | 3(1)     | 3(1)     | 3(1)     |
| C(13) | 40(1)    | 34(1)    | 34(1)    | 5(1)     | 0(1)     | -5(1)    |
| C(14) | 45(1)    | 41(1)    | 38(1)    | 3(1)     | 7(1)     | 21(1)    |

# Supplementary Material (ESI) for Chemical Communications  
# This journal is © The Royal Society of Chemistry 2005

Table 4. Hydrogen coordinates ( $\times 10^4$ ) and isotropic displacement parameters ( $\text{\AA}^2 \times 10^{-3}$ ) for  $[\text{Mn}_2(\text{CO})_8(\mu\text{-PN}^t\text{Pr}_2)]$  (**1**).

|        | x     | y    | z    | U(eq) |
|--------|-------|------|------|-------|
| H(9)   | 689   | 2917 | 3090 | 35    |
| H(10A) | 3966  | 4339 | 3771 | 42    |
| H(10B) | 2581  | 3945 | 4486 | 42    |
| H(10C) | 2825  | 5560 | 4333 | 42    |
| H(11A) | -964  | 5475 | 3856 | 45    |
| H(11B) | -1334 | 3952 | 4126 | 45    |
| H(11C) | -2237 | 4032 | 3135 | 45    |
| H(12)  | 1099  | 3952 | 1123 | 33    |
| H(13A) | -1094 | 1820 | 1825 | 46    |
| H(13B) | -1149 | 1749 | 775  | 46    |
| H(13C) | -2118 | 2994 | 1414 | 46    |
| H(14A) | 4108  | 3311 | 1760 | 49    |
| H(14B) | 2778  | 1942 | 1000 | 49    |
| H(14C) | 2773  | 2027 | 2048 | 49    |

Table 5. Atomic coordinates ( $\times 10^4$ ) and equivalent isotropic displacement parameters ( $\text{\AA}^2 \times 10^3$ ) for  $[\text{Mn}_2(\text{CO})_8(\mu-\eta^1, \eta^2\text{-P}(\text{N}^i\text{Pr}_2)=\text{NTMS})]$  (**3a**).  $U(\text{eq})$  is defined as one third of the trace of the orthogonalized  $U^{ij}$  tensor.

|       | x       | y       | z       | U(eq) |
|-------|---------|---------|---------|-------|
| Mn(1) | 1809(1) | 4566(1) | 1868(1) | 16(1) |
| Mn(2) | 3769(1) | 4297(1) | 2932(1) | 17(1) |
| P(1)  | 2855(1) | 5600(1) | 3259(1) | 15(1) |
| Si(1) | 1273(1) | 4593(1) | 3884(1) | 19(1) |
| N(1)  | 2966(1) | 7150(1) | 3446(1) | 17(1) |
| N(2)  | 1924(1) | 5053(1) | 3263(1) | 18(1) |
| O(1)  | -213(1) | 4278(1) | 887(1)  | 38(1) |
| O(2)  | 1966(1) | 1749(1) | 2204(1) | 30(1) |
| O(3)  | 2230(1) | 3996(1) | 221(1)  | 31(1) |
| O(4)  | 1440(1) | 7255(1) | 1199(1) | 28(1) |
| O(5)  | 3453(1) | 2432(1) | 4227(1) | 36(1) |
| O(6)  | 4039(1) | 2142(1) | 1825(1) | 38(1) |
| O(7)  | 5656(1) | 4655(1) | 4356(1) | 33(1) |
| O(8)  | 4184(1) | 6038(1) | 1633(1) | 33(1) |
| C(1)  | 567(1)  | 4376(1) | 1289(1) | 25(1) |
| C(2)  | 1943(1) | 2826(1) | 2132(1) | 22(1) |
| C(3)  | 2070(1) | 4223(1) | 859(1)  | 22(1) |
| C(4)  | 1618(1) | 6254(1) | 1491(1) | 20(1) |
| C(5)  | 3551(1) | 3143(1) | 3724(1) | 24(1) |
| C(6)  | 3939(1) | 2970(1) | 2249(1) | 25(1) |
| C(7)  | 4930(1) | 4514(1) | 3799(1) | 23(1) |
| C(8)  | 4006(1) | 5405(1) | 2133(1) | 22(1) |
| C(9)  | 2221(1) | 7850(1) | 3620(1) | 21(1) |
| C(10) | 2431(1) | 7939(1) | 4659(1) | 28(1) |
| C(11) | 1987(1) | 9149(1) | 3155(1) | 26(1) |
| C(12) | 3826(1) | 7773(1) | 3476(1) | 22(1) |
| C(13) | 3678(1) | 8578(1) | 2609(1) | 30(1) |
| C(14) | 4332(1) | 8524(1) | 4369(1) | 31(1) |
| C(15) | 729(1)  | 3015(1) | 3462(1) | 29(1) |

# Supplementary Material (ESI) for Chemical Communications  
# This journal is © The Royal Society of Chemistry 2005

|       |         |         |         |       |
|-------|---------|---------|---------|-------|
| C(16) | 324(1)  | 5750(1) | 3726(1) | 32(1) |
| C(17) | 2026(1) | 4446(1) | 5144(1) | 31(1) |

---

Table 6. Bond lengths [Å] and angles [°] for  $[\text{Mn}_2(\text{CO})_8(\mu-\eta^1, \eta^2\text{-P}(\text{N}^i\text{Pr}_2)=\text{NTMS})]$  (**3a**) .

---

|             |            |
|-------------|------------|
| Mn(1)-C(3)  | 1.8113(12) |
| Mn(1)-C(1)  | 1.8143(12) |
| Mn(1)-C(4)  | 1.8551(12) |
| Mn(1)-C(2)  | 1.8674(12) |
| Mn(1)-N(2)  | 2.1717(9)  |
| Mn(1)-P(1)  | 2.4084(3)  |
| Mn(1)-Mn(2) | 2.8888(3)  |
| Mn(2)-C(7)  | 1.8120(12) |
| Mn(2)-C(6)  | 1.8358(12) |
| Mn(2)-C(8)  | 1.8466(12) |
| Mn(2)-C(5)  | 1.8560(12) |
| Mn(2)-P(1)  | 2.1857(3)  |
| P(1)-N(2)   | 1.5756(9)  |
| P(1)-N(1)   | 1.6512(9)  |
| Si(1)-N(2)  | 1.7297(9)  |
| Si(1)-C(17) | 1.8617(13) |
| Si(1)-C(15) | 1.8633(13) |
| Si(1)-C(16) | 1.8656(13) |
| N(1)-C(12)  | 1.4873(13) |
| N(1)-C(9)   | 1.4935(13) |
| O(1)-C(1)   | 1.1431(15) |
| O(2)-C(2)   | 1.1364(15) |
| O(3)-C(3)   | 1.1435(15) |
| O(4)-C(4)   | 1.1357(15) |
| O(5)-C(5)   | 1.1356(15) |
| O(6)-C(6)   | 1.1397(15) |
| O(7)-C(7)   | 1.1416(15) |
| O(8)-C(8)   | 1.1394(15) |
| C(9)-C(11)  | 1.5213(16) |
| C(9)-C(10)  | 1.5247(16) |
| C(12)-C(14) | 1.5265(17) |
| C(12)-C(13) | 1.5333(17) |

# Supplementary Material (ESI) for Chemical Communications  
# This journal is © The Royal Society of Chemistry 2005

|                  |           |
|------------------|-----------|
| C(3)-Mn(1)-C(1)  | 96.36(5)  |
| C(3)-Mn(1)-C(4)  | 88.77(5)  |
| C(1)-Mn(1)-C(4)  | 86.46(5)  |
| C(3)-Mn(1)-C(2)  | 87.22(5)  |
| C(1)-Mn(1)-C(2)  | 90.50(5)  |
| C(4)-Mn(1)-C(2)  | 174.67(5) |
| C(3)-Mn(1)-N(2)  | 163.45(4) |
| C(1)-Mn(1)-N(2)  | 100.18(5) |
| C(4)-Mn(1)-N(2)  | 91.88(4)  |
| C(2)-Mn(1)-N(2)  | 92.96(4)  |
| C(3)-Mn(1)-P(1)  | 124.41(4) |
| C(1)-Mn(1)-P(1)  | 136.21(4) |
| C(4)-Mn(1)-P(1)  | 79.86(3)  |
| C(2)-Mn(1)-P(1)  | 105.31(4) |
| N(2)-Mn(1)-P(1)  | 39.82(2)  |
| C(3)-Mn(1)-Mn(2) | 85.74(4)  |
| C(1)-Mn(1)-Mn(2) | 167.17(4) |
| C(4)-Mn(1)-Mn(2) | 106.27(3) |
| C(2)-Mn(1)-Mn(2) | 76.93(3)  |
| N(2)-Mn(1)-Mn(2) | 78.20(2)  |
| P(1)-Mn(1)-Mn(2) | 47.680(8) |
| C(7)-Mn(2)-C(6)  | 101.30(5) |
| C(7)-Mn(2)-C(8)  | 90.82(5)  |
| C(6)-Mn(2)-C(8)  | 88.51(5)  |
| C(7)-Mn(2)-C(5)  | 88.89(5)  |
| C(6)-Mn(2)-C(5)  | 89.82(6)  |
| C(8)-Mn(2)-C(5)  | 178.21(5) |
| C(7)-Mn(2)-P(1)  | 108.07(4) |
| C(6)-Mn(2)-P(1)  | 150.34(4) |
| C(8)-Mn(2)-P(1)  | 95.00(4)  |
| C(5)-Mn(2)-P(1)  | 86.77(4)  |
| C(7)-Mn(2)-Mn(1) | 162.61(4) |
| C(6)-Mn(2)-Mn(1) | 96.08(4)  |
| C(8)-Mn(2)-Mn(1) | 90.10(4)  |
| C(5)-Mn(2)-Mn(1) | 90.71(4)  |

# Supplementary Material (ESI) for Chemical Communications  
# This journal is © The Royal Society of Chemistry 2005

|                   |            |
|-------------------|------------|
| P(1)-Mn(2)-Mn(1)  | 54.562(9)  |
| N(2)-P(1)-N(1)    | 113.15(5)  |
| N(2)-P(1)-Mn(2)   | 118.04(4)  |
| N(1)-P(1)-Mn(2)   | 128.69(3)  |
| N(2)-P(1)-Mn(1)   | 61.97(3)   |
| N(1)-P(1)-Mn(1)   | 126.23(4)  |
| Mn(2)-P(1)-Mn(1)  | 77.758(11) |
| N(2)-Si(1)-C(17)  | 110.00(5)  |
| N(2)-Si(1)-C(15)  | 109.93(5)  |
| C(17)-Si(1)-C(15) | 108.28(6)  |
| N(2)-Si(1)-C(16)  | 111.30(5)  |
| C(17)-Si(1)-C(16) | 109.84(7)  |
| C(15)-Si(1)-C(16) | 107.41(6)  |
| C(12)-N(1)-C(9)   | 123.10(9)  |
| C(12)-N(1)-P(1)   | 118.09(7)  |
| C(9)-N(1)-P(1)    | 118.74(7)  |
| P(1)-N(2)-Si(1)   | 149.12(6)  |
| P(1)-N(2)-Mn(1)   | 78.21(4)   |
| Si(1)-N(2)-Mn(1)  | 131.22(5)  |
| O(1)-C(1)-Mn(1)   | 176.83(11) |
| O(2)-C(2)-Mn(1)   | 173.21(11) |
| O(3)-C(3)-Mn(1)   | 179.41(11) |
| O(4)-C(4)-Mn(1)   | 174.42(10) |
| O(5)-C(5)-Mn(2)   | 177.36(11) |
| O(6)-C(6)-Mn(2)   | 179.52(11) |
| O(7)-C(7)-Mn(2)   | 178.91(11) |
| O(8)-C(8)-Mn(2)   | 176.07(11) |
| N(1)-C(9)-C(11)   | 114.60(9)  |
| N(1)-C(9)-C(10)   | 111.35(9)  |
| C(11)-C(9)-C(10)  | 111.25(10) |
| N(1)-C(12)-C(14)  | 113.51(10) |
| N(1)-C(12)-C(13)  | 113.11(9)  |
| C(14)-C(12)-C(13) | 111.42(10) |

---

Symmetry transformations used to generate equivalent atoms:



# Supplementary Material (ESI) for Chemical Communications  
# This journal is © The Royal Society of Chemistry 2005

Table 7. Anisotropic displacement parameters ( $\text{\AA}^2 \times 10^3$ ) for  $[\text{Mn}_2(\text{CO})_8(\mu-\eta^1, \eta^2\text{-P}(\text{N}^i\text{Pr}_2)=\text{NTMS})]$  (**3a**).  
 The anisotropic displacement factor exponent takes the form:  $-2\pi^2[ h^2 a^{*2}U^{11} + \dots + 2 h k a^* b^* U^{12} ]$

|       | $U^{11}$ | $U^{22}$ | $U^{33}$ | $U^{23}$ | $U^{13}$ | $U^{12}$ |
|-------|----------|----------|----------|----------|----------|----------|
| Mn(1) | 15(1)    | 17(1)    | 16(1)    | 0(1)     | 6(1)     | -1(1)    |
| Mn(2) | 15(1)    | 18(1)    | 18(1)    | 0(1)     | 6(1)     | 1(1)     |
| P(1)  | 14(1)    | 16(1)    | 16(1)    | 0(1)     | 6(1)     | 0(1)     |
| Si(1) | 17(1)    | 21(1)    | 20(1)    | 3(1)     | 9(1)     | 0(1)     |
| N(1)  | 16(1)    | 16(1)    | 21(1)    | -1(1)    | 8(1)     | -1(1)    |
| N(2)  | 17(1)    | 21(1)    | 18(1)    | 0(1)     | 8(1)     | -2(1)    |
| O(1)  | 20(1)    | 49(1)    | 38(1)    | 6(1)     | 4(1)     | -7(1)    |
| O(2)  | 34(1)    | 20(1)    | 34(1)    | 1(1)     | 12(1)    | -3(1)    |
| O(3)  | 43(1)    | 29(1)    | 26(1)    | -3(1)    | 19(1)    | 0(1)     |
| O(4)  | 35(1)    | 24(1)    | 25(1)    | 4(1)     | 11(1)    | 5(1)     |
| O(5)  | 33(1)    | 34(1)    | 39(1)    | 14(1)    | 13(1)    | 1(1)     |
| O(6)  | 31(1)    | 37(1)    | 45(1)    | -17(1)   | 12(1)    | 3(1)     |
| O(7)  | 21(1)    | 44(1)    | 29(1)    | 3(1)     | 3(1)     | -3(1)    |
| O(8)  | 33(1)    | 41(1)    | 27(1)    | 6(1)     | 13(1)    | -5(1)    |
| C(1)  | 23(1)    | 26(1)    | 24(1)    | 3(1)     | 8(1)     | -2(1)    |
| C(2)  | 21(1)    | 24(1)    | 20(1)    | -2(1)    | 8(1)     | -3(1)    |
| C(3)  | 23(1)    | 18(1)    | 23(1)    | 0(1)     | 8(1)     | -2(1)    |
| C(4)  | 19(1)    | 24(1)    | 18(1)    | -1(1)    | 8(1)     | 0(1)     |
| C(5)  | 19(1)    | 23(1)    | 27(1)    | 2(1)     | 6(1)     | 3(1)     |
| C(6)  | 18(1)    | 28(1)    | 29(1)    | -3(1)    | 7(1)     | 1(1)     |
| C(7)  | 22(1)    | 25(1)    | 23(1)    | 2(1)     | 10(1)    | 2(1)     |
| C(8)  | 18(1)    | 27(1)    | 20(1)    | -2(1)    | 6(1)     | 1(1)     |
| C(9)  | 20(1)    | 20(1)    | 24(1)    | 0(1)     | 11(1)    | 3(1)     |
| C(10) | 35(1)    | 27(1)    | 26(1)    | -2(1)    | 16(1)    | 5(1)     |
| C(11) | 26(1)    | 21(1)    | 31(1)    | 2(1)     | 11(1)    | 5(1)     |
| C(12) | 18(1)    | 20(1)    | 29(1)    | -1(1)    | 10(1)    | -3(1)    |
| C(13) | 28(1)    | 28(1)    | 39(1)    | 7(1)     | 19(1)    | -2(1)    |
| C(14) | 24(1)    | 27(1)    | 38(1)    | -8(1)    | 6(1)     | -6(1)    |
| C(15) | 31(1)    | 27(1)    | 33(1)    | 1(1)     | 15(1)    | -9(1)    |
| C(16) | 24(1)    | 34(1)    | 44(1)    | 5(1)     | 19(1)    | 5(1)     |

# Supplementary Material (ESI) for Chemical Communications  
# This journal is © The Royal Society of Chemistry 2005

C(17)    33(1)    37(1)    22(1)    6(1)    10(1)    -3(1)

---

Table 8. Hydrogen coordinates ( $\times 10^4$ ) and isotropic displacement parameters ( $\text{\AA}^2 \times 10^{-3}$ ) for  $[\text{Mn}_2(\text{CO})_8(\mu-\eta^1, \eta^2\text{-P}(\text{N}^i\text{Pr}_2)=\text{NTMS})]$  (**3a**).

|        | x    | y    | z    | U(eq) |
|--------|------|------|------|-------|
| H(9)   | 1650 | 7320 | 3340 | 25    |
| H(10A) | 2639 | 7108 | 4951 | 33    |
| H(10B) | 1871 | 8193 | 4747 | 33    |
| H(10C) | 2916 | 8573 | 4946 | 33    |
| H(11A) | 2518 | 9718 | 3428 | 31    |
| H(11B) | 1455 | 9506 | 3252 | 31    |
| H(11C) | 1834 | 9058 | 2485 | 31    |
| H(12)  | 4251 | 7067 | 3473 | 27    |
| H(13A) | 3275 | 8118 | 2051 | 36    |
| H(13B) | 4275 | 8741 | 2569 | 36    |
| H(13C) | 3389 | 9389 | 2652 | 36    |
| H(14A) | 3963 | 9268 | 4386 | 38    |
| H(14B) | 4932 | 8805 | 4386 | 38    |
| H(14C) | 4425 | 7980 | 4910 | 38    |
| H(15A) | 331  | 3073 | 2798 | 35    |
| H(15B) | 360  | 2763 | 3814 | 35    |
| H(15C) | 1212 | 2379 | 3551 | 35    |
| H(16A) | 588  | 6578 | 3982 | 38    |
| H(16B) | -56  | 5438 | 4053 | 38    |
| H(16C) | -61  | 5840 | 3061 | 38    |
| H(17A) | 2497 | 3794 | 5226 | 37    |
| H(17B) | 1650 | 4202 | 5492 | 37    |
| H(17C) | 2327 | 5264 | 5376 | 37    |

Table 9. Atomic coordinates ( $\times 10^4$ ) and equivalent isotropic displacement parameters ( $\text{\AA}^2 \times 10^3$ ) for  $[\text{Mn}_2(\text{CO})_8(\mu-\eta^1, \eta^2\text{-P}(\text{N}^i\text{Pr}_2)=\text{NPh})]$  (**3c**).  $U(\text{eq})$  is defined as one third of the trace of the orthogonalized  $U^{ij}$  tensor.

|       | x        | y        | z       | U(eq) |
|-------|----------|----------|---------|-------|
| Mn(1) | 8906(1)  | 4219(1)  | 1197(1) | 22(1) |
| Mn(2) | 6604(1)  | 2549(1)  | 666(1)  | 22(1) |
| P(1)  | 8701(1)  | 2056(1)  | 1357(1) | 18(1) |
| O(1)  | 6615(2)  | 4385(1)  | -167(1) | 58(1) |
| O(2)  | 4520(1)  | 4484(1)  | 1105(1) | 33(1) |
| O(5)  | 11551(1) | 5452(1)  | 1791(1) | 44(1) |
| O(7)  | 8668(1)  | 768(1)   | 163(1)  | 44(1) |
| O(9)  | 3878(1)  | 1101(1)  | 204(1)  | 46(1) |
| O(14) | 6963(1)  | 4696(1)  | 1976(1) | 46(1) |
| O(15) | 10807(1) | 3604(1)  | 411(1)  | 50(1) |
| O(16) | 7578(1)  | 6673(1)  | 674(1)  | 48(1) |
| N(1)  | 10007(1) | 864(1)   | 1463(1) | 21(1) |
| N(2)  | 7015(1)  | 1467(1)  | 1317(1) | 21(1) |
| C(4)  | 5343(1)  | 3768(1)  | 951(1)  | 26(1) |
| C(6)  | 8107(2)  | 5729(1)  | 868(1)  | 33(1) |
| C(8)  | 7896(1)  | 1416(1)  | 367(1)  | 30(1) |
| C(10) | 10519(1) | 4982(1)  | 1560(1) | 31(1) |
| C(11) | 4935(1)  | 1637(1)  | 390(1)  | 31(1) |
| C(12) | 10094(1) | 3831(1)  | 712(1)  | 32(1) |
| C(13) | 6344(1)  | 351(1)   | 1528(1) | 23(1) |
| C(17) | 6611(2)  | 3691(2)  | 161(1)  | 37(1) |
| C(18) | 11532(1) | 1139(1)  | 1744(1) | 28(1) |
| C(19) | 7677(1)  | 4522(1)  | 1670(1) | 30(1) |
| C(20) | 12613(1) | 1914(1)  | 1460(1) | 37(1) |
| C(21) | 9687(1)  | -595(1)  | 1332(1) | 24(1) |
| C(22) | 5678(1)  | -723(1)  | 1252(1) | 32(1) |
| C(23) | 11359(2) | 1810(1)  | 2224(1) | 37(1) |
| C(24) | 9623(2)  | -1480(1) | 1774(1) | 32(1) |
| C(26) | 10845(2) | -1133(1) | 1016(1) | 35(1) |

# Supplementary Material (ESI) for Chemical Communications  
# This journal is © The Royal Society of Chemistry 2005

|       |         |          |         |       |
|-------|---------|----------|---------|-------|
| C(27) | 6314(1) | 343(1)   | 2024(1) | 33(1) |
| C(28) | 5627(2) | -735(2)  | 2239(1) | 49(1) |
| C(29) | 5000(2) | -1799(1) | 1475(1) | 47(1) |
| C(30) | 4971(2) | -1799(2) | 1966(1) | 55(1) |

---

Table 10. Bond lengths [Å] and angles [°] for  $[\text{Mn}_2(\text{CO})_8(\mu-\eta^1, \eta^2\text{-P}(\text{N}^i\text{Pr}_2)=\text{NPh})]$  (**3c**).

---

|             |             |
|-------------|-------------|
| Mn(1)-C(10) | 1.8066(13)  |
| Mn(1)-C(6)  | 1.8349(13)  |
| Mn(1)-C(19) | 1.8390(13)  |
| Mn(1)-C(12) | 1.8568(14)  |
| Mn(1)-P(1)  | 2.1753(4) Å |
| Mn(1)-Mn(2) | 2.8751(3)   |
| Mn(2)-C(17) | 1.8059(13)  |
| Mn(2)-C(11) | 1.8117(13)  |
| Mn(2)-C(8)  | 1.8614(13)  |
| Mn(2)-C(4)  | 1.8743(12)  |
| Mn(2)-N(2)  | 2.1031(9)   |
| Mn(2)-P(1)  | 2.5574(4)   |
| P(1)-N(2)   | 1.5861(9)   |
| P(1)-N(1)   | 1.6396(9)   |
| O(1)-C(17)  | 1.1429(17)  |
| O(2)-C(4)   | 1.1333(15)  |
| O(5)-C(10)  | 1.1481(16)  |
| O(7)-C(8)   | 1.1348(16)  |
| O(9)-C(11)  | 1.1392(16)  |
| O(14)-C(19) | 1.1389(17)  |
| O(15)-C(12) | 1.1350(17)  |
| O(16)-C(6)  | 1.1420(16)  |
| N(1)-C(21)  | 1.4916(13)  |
| N(1)-C(18)  | 1.4984(14)  |
| N(2)-C(13)  | 1.4071(13)  |
| C(13)-C(22) | 1.3916(17)  |
| C(13)-C(27) | 1.3956(17)  |
| C(18)-C(20) | 1.5183(18)  |
| C(18)-C(23) | 1.5221(19)  |
| C(21)-C(24) | 1.5207(17)  |
| C(21)-C(26) | 1.5262(16)  |
| C(22)-C(29) | 1.3943(18)  |
| C(27)-C(28) | 1.3895(19)  |

# Supplementary Material (ESI) for Chemical Communications  
# This journal is © The Royal Society of Chemistry 2005

|                   |            |
|-------------------|------------|
| C(28)-C(30)       | 1.376(3)   |
| C(29)-C(30)       | 1.383(3)   |
| C(10)-Mn(1)-C(6)  | 100.31(6)  |
| C(10)-Mn(1)-C(19) | 91.10(6)   |
| C(6)-Mn(1)-C(19)  | 90.53(6)   |
| C(10)-Mn(1)-C(12) | 91.23(6)   |
| C(6)-Mn(1)-C(12)  | 90.75(6)   |
| C(19)-Mn(1)-C(12) | 177.11(5)  |
| C(10)-Mn(1)-P(1)  | 111.33(4)  |
| C(6)-Mn(1)-P(1)   | 148.23(4)  |
| C(19)-Mn(1)-P(1)  | 86.29(4)   |
| C(12)-Mn(1)-P(1)  | 91.26(4)   |
| C(10)-Mn(1)-Mn(2) | 169.73(4)  |
| C(6)-Mn(1)-Mn(2)  | 89.62(4)   |
| C(19)-Mn(1)-Mn(2) | 91.40(4)   |
| C(12)-Mn(1)-Mn(2) | 86.02(4)   |
| P(1)-Mn(1)-Mn(2)  | 58.917(10) |
| C(17)-Mn(2)-C(11) | 92.82(6)   |
| C(17)-Mn(2)-C(8)  | 87.28(6)   |
| C(11)-Mn(2)-C(8)  | 91.45(5)   |
| C(17)-Mn(2)-C(4)  | 90.05(6)   |
| C(11)-Mn(2)-C(4)  | 90.06(5)   |
| C(8)-Mn(2)-C(4)   | 177.00(5)  |
| C(17)-Mn(2)-N(2)  | 167.49(5)  |
| C(11)-Mn(2)-N(2)  | 99.68(5)   |
| C(8)-Mn(2)-N(2)   | 92.43(5)   |
| C(4)-Mn(2)-N(2)   | 89.88(4)   |
| C(17)-Mn(2)-P(1)  | 129.85(4)  |
| C(11)-Mn(2)-P(1)  | 134.90(4)  |
| C(8)-Mn(2)-P(1)   | 78.67(4)   |
| C(4)-Mn(2)-P(1)   | 102.05(4)  |
| N(2)-Mn(2)-P(1)   | 38.25(2)   |
| C(17)-Mn(2)-Mn(1) | 89.16(5)   |
| C(11)-Mn(2)-Mn(1) | 170.47(4)  |



# Supplementary Material (ESI) for Chemical Communications  
# This journal is © The Royal Society of Chemistry 2005

|                   |            |
|-------------------|------------|
| C(8)-Mn(2)-Mn(1)  | 97.96(4)   |
| C(4)-Mn(2)-Mn(1)  | 80.61(4)   |
| N(2)-Mn(2)-Mn(1)  | 78.49(3)   |
| P(1)-Mn(2)-Mn(1)  | 46.758(9)  |
| N(2)-P(1)-N(1)    | 112.82(5)  |
| N(2)-P(1)-Mn(1)   | 116.03(3)  |
| N(1)-P(1)-Mn(1)   | 130.81(4)  |
| N(2)-P(1)-Mn(2)   | 55.18(3)   |
| N(1)-P(1)-Mn(2)   | 134.25(4)  |
| Mn(1)-P(1)-Mn(2)  | 74.325(10) |
| C(21)-N(1)-C(18)  | 115.59(8)  |
| C(21)-N(1)-P(1)   | 121.81(7)  |
| C(18)-N(1)-P(1)   | 122.25(7)  |
| C(13)-N(2)-P(1)   | 133.65(8)  |
| C(13)-N(2)-Mn(2)  | 136.05(7)  |
| P(1)-N(2)-Mn(2)   | 86.57(4)   |
| O(2)-C(4)-Mn(2)   | 176.46(11) |
| O(16)-C(6)-Mn(1)  | 177.89(14) |
| O(7)-C(8)-Mn(2)   | 176.24(12) |
| O(5)-C(10)-Mn(1)  | 179.25(12) |
| O(9)-C(11)-Mn(2)  | 177.47(13) |
| O(15)-C(12)-Mn(1) | 179.05(13) |
| C(22)-C(13)-C(27) | 119.51(11) |
| C(22)-C(13)-N(2)  | 121.41(11) |
| C(27)-C(13)-N(2)  | 119.06(11) |
| O(1)-C(17)-Mn(2)  | 178.22(15) |
| N(1)-C(18)-C(20)  | 113.17(10) |
| N(1)-C(18)-C(23)  | 111.27(10) |
| C(20)-C(18)-C(23) | 112.73(11) |
| O(14)-C(19)-Mn(1) | 177.36(12) |
| N(1)-C(21)-C(24)  | 111.63(9)  |
| N(1)-C(21)-C(26)  | 110.63(9)  |
| C(24)-C(21)-C(26) | 111.88(10) |
| C(13)-C(22)-C(29) | 119.67(14) |
| C(28)-C(27)-C(13) | 120.00(14) |

# Supplementary Material (ESI) for Chemical Communications  
# This journal is © The Royal Society of Chemistry 2005

|                   |            |
|-------------------|------------|
| C(30)-C(28)-C(27) | 120.47(16) |
| C(30)-C(29)-C(22) | 120.51(15) |
| C(28)-C(30)-C(29) | 119.84(13) |

---

Symmetry transformations used to generate equivalent atoms:

Table 11. Anisotropic displacement parameters ( $\text{\AA}^2 \times 10^3$ ) for  $[\text{Mn}_2(\text{CO})_8(\mu-\eta^1, \eta^2\text{-P}(\text{N}^i\text{Pr}_2)=\text{NPh})]$  (**3c**).  
 The anisotropic displacement factor exponent takes the form:  $-2\pi^2 [h^2 a^{*2}U^{11} + \dots + 2 h k a^* b^* U^{12}]$

|       | $U^{11}$ | $U^{22}$ | $U^{33}$ | $U^{23}$ | $U^{13}$ | $U^{12}$ |
|-------|----------|----------|----------|----------|----------|----------|
| Mn(1) | 22(1)    | 17(1)    | 27(1)    | 2(1)     | 1(1)     | 0(1)     |
| Mn(2) | 22(1)    | 25(1)    | 19(1)    | 2(1)     | 1(1)     | -1(1)    |
| P(1)  | 19(1)    | 17(1)    | 18(1)    | 0(1)     | 2(1)     | 1(1)     |
| O(1)  | 60(1)    | 73(1)    | 39(1)    | 29(1)    | 0(1)     | -6(1)    |
| O(2)  | 31(1)    | 31(1)    | 39(1)    | 2(1)     | 4(1)     | 6(1)     |
| O(5)  | 32(1)    | 30(1)    | 65(1)    | -9(1)    | -11(1)   | -1(1)    |
| O(7)  | 36(1)    | 66(1)    | 31(1)    | -16(1)   | 9(1)     | 4(1)     |
| O(9)  | 33(1)    | 49(1)    | 52(1)    | -14(1)   | -9(1)    | -4(1)    |
| O(14) | 42(1)    | 54(1)    | 44(1)    | -21(1)   | 13(1)    | -4(1)    |
| O(15) | 47(1)    | 59(1)    | 48(1)    | 2(1)     | 24(1)    | -8(1)    |
| O(16) | 51(1)    | 30(1)    | 62(1)    | 15(1)    | -5(1)    | 4(1)     |
| N(1)  | 20(1)    | 18(1)    | 25(1)    | 0(1)     | 1(1)     | 2(1)     |
| N(2)  | 21(1)    | 20(1)    | 21(1)    | 2(1)     | 1(1)     | 0(1)     |
| C(4)  | 25(1)    | 24(1)    | 27(1)    | 6(1)     | -2(1)    | -1(1)    |
| C(6)  | 31(1)    | 25(1)    | 43(1)    | 5(1)     | 0(1)     | -2(1)    |
| C(8)  | 27(1)    | 41(1)    | 21(1)    | -3(1)    | 1(1)     | -3(1)    |
| C(10) | 29(1)    | 20(1)    | 44(1)    | -1(1)    | 1(1)     | 2(1)     |
| C(11) | 29(1)    | 34(1)    | 28(1)    | -3(1)    | 1(1)     | 2(1)     |
| C(12) | 31(1)    | 29(1)    | 38(1)    | 6(1)     | 6(1)     | -5(1)    |
| C(13) | 18(1)    | 21(1)    | 32(1)    | 6(1)     | 6(1)     | 4(1)     |
| C(17) | 35(1)    | 45(1)    | 29(1)    | 9(1)     | -1(1)    | -2(1)    |
| C(18) | 21(1)    | 23(1)    | 37(1)    | 1(1)     | -4(1)    | 3(1)     |
| C(19) | 28(1)    | 24(1)    | 36(1)    | -6(1)    | 0(1)     | -1(1)    |
| C(20) | 20(1)    | 31(1)    | 60(1)    | 2(1)     | 6(1)     | 1(1)     |
| C(21) | 24(1)    | 19(1)    | 30(1)    | -4(1)    | 5(1)     | 2(1)     |
| C(22) | 23(1)    | 23(1)    | 49(1)    | 4(1)     | 2(1)     | 0(1)     |
| C(23) | 40(1)    | 33(1)    | 33(1)    | 0(1)     | -12(1)   | 0(1)     |
| C(24) | 34(1)    | 21(1)    | 43(1)    | 6(1)     | 9(1)     | 5(1)     |
| C(26) | 32(1)    | 33(1)    | 40(1)    | -10(1)   | 11(1)    | 6(1)     |
| C(27) | 30(1)    | 38(1)    | 34(1)    | 11(1)    | 12(1)    | 10(1)    |

# Supplementary Material (ESI) for Chemical Communications  
# This journal is © The Royal Society of Chemistry 2005

|       |       |       |       |       |       |       |
|-------|-------|-------|-------|-------|-------|-------|
| C(28) | 38(1) | 59(1) | 55(1) | 33(1) | 24(1) | 16(1) |
| C(29) | 25(1) | 26(1) | 87(1) | 15(1) | 3(1)  | -3(1) |
| C(30) | 30(1) | 48(1) | 91(1) | 40(1) | 19(1) | 3(1)  |

---

Table 12. Hydrogen coordinates ( $\times 10^4$ ) and isotropic displacement parameters ( $\text{\AA}^2 \times 10^{-3}$ ) for  $[\text{Mn}_2(\text{CO})_8(\mu-\eta^1, \eta^2\text{-P}(\text{N}^i\text{Pr}_2)=\text{NPh})]$  (**3c**).

|        | x     | y     | z    | U(eq) |
|--------|-------|-------|------|-------|
| H(18)  | 12011 | 225   | 1820 | 33    |
| H(20A) | 12647 | 1465  | 1150 | 56    |
| H(20B) | 13638 | 1922  | 1640 | 56    |
| H(20C) | 12250 | 2856  | 1408 | 56    |
| H(21)  | 8657  | -632  | 1139 | 29    |
| H(22)  | 5684  | -724  | 914  | 38    |
| H(23A) | 10960 | 2740  | 2169 | 55    |
| H(23B) | 12356 | 1849  | 2420 | 55    |
| H(23C) | 10649 | 1274  | 2391 | 55    |
| H(24A) | 10647 | -1553 | 1952 | 48    |
| H(24B) | 9251  | -2395 | 1676 | 48    |
| H(24C) | 8929  | -1064 | 1980 | 48    |
| H(26A) | 10866 | -529  | 739  | 52    |
| H(26B) | 10553 | -2057 | 905  | 52    |
| H(26C) | 11860 | -1159 | 1202 | 52    |
| H(27)  | 6763  | 1074  | 2215 | 40    |
| H(28)  | 5611  | -738  | 2577 | 59    |
| H(29)  | 4555  | -2538 | 1287 | 56    |
| H(30)  | 4499  | -2530 | 2115 | 66    |

Table 13. Atomic coordinates ( $\times 10^4$ ) and equivalent isotropic displacement parameters ( $\text{\AA}^2 \times 10^3$ ) for  $[\text{Co}_2(\text{CO})_4(\mu\text{-dppm})(\mu\text{-}\eta^1, \eta^2\text{-P(TMP)=CH}_2)]$  (**4b**).  $U(\text{eq})$  is defined as one third of the trace of the orthogonalized  $U^{ij}$  tensor.

|       | x       | y       | z       | U(eq) |
|-------|---------|---------|---------|-------|
| Co(1) | 1090(1) | 2898(1) | 2901(1) | 19(1) |
| Co(2) | 1521(1) | 4300(1) | 3818(1) | 18(1) |
| P(1)  | 1248(1) | 4404(1) | 2327(1) | 18(1) |
| P(2)  | 2023(1) | 5107(1) | 3372(1) | 17(1) |
| P(3)  | 932(1)  | 3165(1) | 3735(1) | 20(1) |
| O(1)  | 1974(1) | 1689(2) | 3042(1) | 36(1) |
| O(2)  | 498(1)  | 1035(2) | 2220(1) | 45(1) |
| O(3)  | 2049(1) | 3486(2) | 4940(1) | 41(1) |
| O(4)  | 1031(1) | 6589(2) | 3937(1) | 33(1) |
| N(1)  | 751(1)  | 2243(2) | 4212(1) | 27(1) |
| C(2A) | 523(1)  | 3701(2) | 3150(1) | 23(1) |
| C(1)  | 1629(1) | 2182(2) | 3005(1) | 26(1) |
| C(2)  | 736(1)  | 1755(2) | 2481(1) | 28(1) |
| C(3)  | 1852(1) | 3743(2) | 4480(1) | 26(1) |
| C(4)  | 1220(1) | 5693(2) | 3858(1) | 22(1) |
| C(5)  | 1831(1) | 5023(2) | 2569(1) | 20(1) |
| C(6)  | 895(1)  | 5803(2) | 2205(1) | 20(1) |
| C(7)  | 477(1)  | 5748(2) | 1813(1) | 31(1) |
| C(8)  | 200(1)  | 6790(2) | 1710(1) | 36(1) |
| C(9)  | 330(1)  | 7899(2) | 2007(1) | 32(1) |
| C(10) | 737(1)  | 7955(2) | 2409(1) | 28(1) |
| C(11) | 1020(1) | 6915(2) | 2507(1) | 23(1) |
| C(12) | 1288(1) | 3933(2) | 1587(1) | 22(1) |
| C(13) | 1293(1) | 4796(2) | 1145(1) | 31(1) |
| C(14) | 1371(1) | 4405(2) | 611(1)  | 36(1) |
| C(15) | 1440(1) | 3160(2) | 508(1)  | 36(1) |
| C(16) | 1439(1) | 2291(2) | 941(1)  | 35(1) |
| C(17) | 1362(1) | 2676(2) | 1478(1) | 29(1) |
| C(18) | 2595(1) | 4427(2) | 3459(1) | 19(1) |

# Supplementary Material (ESI) for Chemical Communications  
# This journal is © The Royal Society of Chemistry 2005

|       |         |         |         |       |
|-------|---------|---------|---------|-------|
| C(19) | 2900(1) | 4919(2) | 3151(1) | 24(1) |
| C(20) | 3322(1) | 4371(2) | 3186(1) | 27(1) |
| C(21) | 3445(1) | 3337(2) | 3539(1) | 27(1) |
| C(22) | 3148(1) | 2856(2) | 3854(1) | 34(1) |
| C(23) | 2722(1) | 3396(2) | 3814(1) | 29(1) |
| C(24) | 2160(1) | 6752(2) | 3552(1) | 20(1) |
| C(25) | 2251(1) | 7660(2) | 3166(1) | 26(1) |
| C(26) | 2357(1) | 8881(2) | 3356(1) | 30(1) |
| C(27) | 2378(1) | 9216(2) | 3928(1) | 31(1) |
| C(28) | 2289(1) | 8326(2) | 4317(1) | 31(1) |
| C(29) | 2180(1) | 7109(2) | 4130(1) | 26(1) |
| C(30) | 891(1)  | 889(2)  | 4300(1) | 36(1) |
| C(31) | 956(1)  | 538(3)  | 4945(1) | 53(1) |
| C(32) | 573(1)  | 937(3)  | 5223(1) | 61(1) |
| C(33) | 496(1)  | 2331(3) | 5145(1) | 53(1) |
| C(34) | 390(1)  | 2759(3) | 4506(1) | 37(1) |
| C(35) | 1346(1) | 654(2)  | 4137(1) | 49(1) |
| C(36) | 538(1)  | 25(2)   | 3921(1) | 45(1) |
| C(37) | -92(1)  | 2364(3) | 4199(1) | 46(1) |
| C(38) | 404(1)  | 4194(3) | 4515(1) | 43(1) |

---

Table 14. Bond lengths [Å] and angles [°] for  $[\text{Co}_2(\text{CO})_4(\mu\text{-dppm})(\mu\text{-}\eta^1,\eta^2\text{-P(TMP)=CH}_2)]$  (**4b**).

---

|             |            |
|-------------|------------|
| Co(1)-C(1)  | 1.766(2)   |
| Co(1)-C(2)  | 1.775(2)   |
| Co(1)-C(2A) | 2.105(2)   |
| Co(1)-P(3)  | 2.1321(6)  |
| Co(1)-P(1)  | 2.2135(6)  |
| Co(1)-Co(2) | 2.7143(5)  |
| Co(2)-C(4)  | 1.755(2)   |
| Co(2)-C(3)  | 1.762(2)   |
| Co(2)-P(3)  | 2.1232(6)  |
| Co(2)-P(2)  | 2.1948(6)  |
| P(1)-C(6)   | 1.8196(19) |
| P(1)-C(12)  | 1.8392(19) |
| P(1)-C(5)   | 1.8498(19) |
| P(2)-C(24)  | 1.831(2)   |
| P(2)-C(18)  | 1.8400(19) |
| P(2)-C(5)   | 1.8525(18) |
| P(3)-N(1)   | 1.6691(17) |
| P(3)-C(2A)  | 1.737(2)   |
| O(1)-C(1)   | 1.151(2)   |
| O(2)-C(2)   | 1.138(3)   |
| O(3)-C(3)   | 1.149(2)   |
| O(4)-C(4)   | 1.148(2)   |
| N(1)-C(30)  | 1.506(3)   |
| N(1)-C(34)  | 1.512(3)   |
| C(6)-C(11)  | 1.392(3)   |
| C(6)-C(7)   | 1.396(3)   |
| C(7)-C(8)   | 1.381(3)   |
| C(8)-C(9)   | 1.387(3)   |
| C(9)-C(10)  | 1.382(3)   |
| C(10)-C(11) | 1.389(3)   |
| C(12)-C(13) | 1.391(3)   |
| C(12)-C(17) | 1.391(3)   |
| C(13)-C(14) | 1.388(3)   |



# Supplementary Material (ESI) for Chemical Communications  
# This journal is © The Royal Society of Chemistry 2005

|                  |            |
|------------------|------------|
| C(14)-C(15)      | 1.373(4)   |
| C(15)-C(16)      | 1.377(3)   |
| C(16)-C(17)      | 1.391(3)   |
| C(18)-C(23)      | 1.383(3)   |
| C(18)-C(19)      | 1.392(3)   |
| C(19)-C(20)      | 1.386(3)   |
| C(20)-C(21)      | 1.382(3)   |
| C(21)-C(22)      | 1.378(3)   |
| C(22)-C(23)      | 1.392(3)   |
| C(24)-C(25)      | 1.394(3)   |
| C(24)-C(29)      | 1.398(3)   |
| C(25)-C(26)      | 1.392(3)   |
| C(26)-C(27)      | 1.378(3)   |
| C(27)-C(28)      | 1.384(3)   |
| C(28)-C(29)      | 1.387(3)   |
| C(30)-C(35)      | 1.523(4)   |
| C(30)-C(31)      | 1.532(3)   |
| C(30)-C(36)      | 1.539(3)   |
| C(31)-C(32)      | 1.507(5)   |
| C(32)-C(33)      | 1.510(5)   |
| C(33)-C(34)      | 1.535(3)   |
| C(34)-C(38)      | 1.532(4)   |
| C(34)-C(37)      | 1.536(3)   |
|                  |            |
| C(1)-Co(1)-C(2)  | 101.91(10) |
| C(1)-Co(1)-C(2A) | 156.49(8)  |
| C(2)-Co(1)-C(2A) | 90.33(9)   |
| C(1)-Co(1)-P(3)  | 108.10(7)  |
| C(2)-Co(1)-P(3)  | 112.14(7)  |
| C(2A)-Co(1)-P(3) | 48.40(6)   |
| C(1)-Co(1)-P(1)  | 94.94(7)   |
| C(2)-Co(1)-P(1)  | 110.01(7)  |
| C(2A)-Co(1)-P(1) | 99.65(6)   |
| P(3)-Co(1)-P(1)  | 125.62(2)  |
| C(1)-Co(1)-Co(2) | 81.83(7)   |

# Supplementary Material (ESI) for Chemical Communications  
# This journal is © The Royal Society of Chemistry 2005

|                   |            |
|-------------------|------------|
| C(2)-Co(1)-Co(2)  | 161.57(7)  |
| C(2A)-Co(1)-Co(2) | 80.53(6)   |
| P(3)-Co(1)-Co(2)  | 50.222(18) |
| P(1)-Co(1)-Co(2)  | 87.41(2)   |
| C(4)-Co(2)-C(3)   | 116.14(9)  |
| C(4)-Co(2)-P(3)   | 93.15(7)   |
| C(3)-Co(2)-P(3)   | 101.16(7)  |
| C(4)-Co(2)-P(2)   | 96.39(7)   |
| C(3)-Co(2)-P(2)   | 103.63(7)  |
| P(3)-Co(2)-P(2)   | 146.02(2)  |
| C(4)-Co(2)-Co(1)  | 110.04(6)  |
| C(3)-Co(2)-Co(1)  | 126.87(7)  |
| P(3)-Co(2)-Co(1)  | 50.511(16) |
| P(2)-Co(2)-Co(1)  | 95.70(2)   |
| C(6)-P(1)-C(12)   | 103.27(9)  |
| C(6)-P(1)-C(5)    | 103.96(9)  |
| C(12)-P(1)-C(5)   | 97.91(8)   |
| C(6)-P(1)-Co(1)   | 119.73(6)  |
| C(12)-P(1)-Co(1)  | 116.38(7)  |
| C(5)-P(1)-Co(1)   | 112.72(6)  |
| C(24)-P(2)-C(18)  | 101.09(8)  |
| C(24)-P(2)-C(5)   | 106.73(9)  |
| C(18)-P(2)-C(5)   | 100.20(8)  |
| C(24)-P(2)-Co(2)  | 114.19(6)  |
| C(18)-P(2)-Co(2)  | 121.19(6)  |
| C(5)-P(2)-Co(2)   | 111.65(6)  |
| N(1)-P(3)-C(2A)   | 116.44(10) |
| N(1)-P(3)-Co(2)   | 131.51(6)  |
| C(2A)-P(3)-Co(2)  | 108.92(8)  |
| N(1)-P(3)-Co(1)   | 135.05(7)  |
| C(2A)-P(3)-Co(1)  | 64.98(7)   |
| Co(2)-P(3)-Co(1)  | 79.27(2)   |
| C(30)-N(1)-C(34)  | 119.60(18) |
| C(30)-N(1)-P(3)   | 122.34(15) |
| C(34)-N(1)-P(3)   | 117.63(15) |

# Supplementary Material (ESI) for Chemical Communications  
# This journal is © The Royal Society of Chemistry 2005

|                   |            |
|-------------------|------------|
| P(3)-C(2A)-Co(1)  | 66.62(7)   |
| O(1)-C(1)-Co(1)   | 176.24(18) |
| O(2)-C(2)-Co(1)   | 177.8(2)   |
| O(3)-C(3)-Co(2)   | 172.7(2)   |
| O(4)-C(4)-Co(2)   | 173.84(17) |
| P(1)-C(5)-P(2)    | 113.61(10) |
| C(11)-C(6)-C(7)   | 118.67(18) |
| C(11)-C(6)-P(1)   | 122.22(15) |
| C(7)-C(6)-P(1)    | 119.06(15) |
| C(8)-C(7)-C(6)    | 120.7(2)   |
| C(7)-C(8)-C(9)    | 120.1(2)   |
| C(10)-C(9)-C(8)   | 119.7(2)   |
| C(9)-C(10)-C(11)  | 120.2(2)   |
| C(10)-C(11)-C(6)  | 120.46(19) |
| C(13)-C(12)-C(17) | 118.18(19) |
| C(13)-C(12)-P(1)  | 122.62(16) |
| C(17)-C(12)-P(1)  | 118.89(15) |
| C(14)-C(13)-C(12) | 120.4(2)   |
| C(15)-C(14)-C(13) | 120.7(2)   |
| C(14)-C(15)-C(16) | 119.8(2)   |
| C(15)-C(16)-C(17) | 119.8(2)   |
| C(12)-C(17)-C(16) | 121.1(2)   |
| C(23)-C(18)-C(19) | 118.83(18) |
| C(23)-C(18)-P(2)  | 120.96(15) |
| C(19)-C(18)-P(2)  | 120.17(14) |
| C(20)-C(19)-C(18) | 120.84(18) |
| C(21)-C(20)-C(19) | 119.83(19) |
| C(22)-C(21)-C(20) | 119.81(19) |
| C(21)-C(22)-C(23) | 120.4(2)   |
| C(18)-C(23)-C(22) | 120.30(19) |
| C(25)-C(24)-C(29) | 117.96(18) |
| C(25)-C(24)-P(2)  | 125.54(15) |
| C(29)-C(24)-P(2)  | 116.49(15) |
| C(26)-C(25)-C(24) | 120.31(19) |
| C(27)-C(26)-C(25) | 121.0(2)   |

# Supplementary Material (ESI) for Chemical Communications  
# This journal is © The Royal Society of Chemistry 2005

|                   |            |
|-------------------|------------|
| C(26)-C(27)-C(28) | 119.4(2)   |
| C(27)-C(28)-C(29) | 119.9(2)   |
| C(28)-C(29)-C(24) | 121.38(19) |
| N(1)-C(30)-C(35)  | 111.34(18) |
| N(1)-C(30)-C(31)  | 110.1(2)   |
| C(35)-C(30)-C(31) | 106.0(2)   |
| N(1)-C(30)-C(36)  | 110.86(18) |
| C(35)-C(30)-C(36) | 107.7(2)   |
| C(31)-C(30)-C(36) | 110.76(19) |
| C(32)-C(31)-C(30) | 114.2(2)   |
| C(31)-C(32)-C(33) | 109.7(2)   |
| C(32)-C(33)-C(34) | 114.0(2)   |
| N(1)-C(34)-C(38)  | 110.42(18) |
| N(1)-C(34)-C(33)  | 108.6(2)   |
| C(38)-C(34)-C(33) | 106.5(2)   |
| N(1)-C(34)-C(37)  | 112.7(2)   |
| C(38)-C(34)-C(37) | 107.5(2)   |
| C(33)-C(34)-C(37) | 110.9(2)   |

---

Symmetry transformations used to generate equivalent atoms:

Table 15. Anisotropic displacement parameters ( $\text{\AA}^2 \times 10^3$ ) for  $[\text{Co}_2(\text{CO})_4(\mu\text{-dppm})(\mu\text{-}\eta^1, \eta^2\text{-P}(\text{TMP})=\text{CH}_2)]$  (**4b**). The anisotropic displacement factor exponent takes the form:  $-2\pi^2 [h^2 a^{*2} U^{11} + \dots + 2 h k a^* b^* U^{12}]$

|       | $U^{11}$ | $U^{22}$ | $U^{33}$ | $U^{23}$ | $U^{13}$ | $U^{12}$ |
|-------|----------|----------|----------|----------|----------|----------|
| Co(1) | 23(1)    | 17(1)    | 18(1)    | 1(1)     | 4(1)     | 1(1)     |
| Co(2) | 17(1)    | 19(1)    | 17(1)    | 2(1)     | 5(1)     | 0(1)     |
| P(1)  | 19(1)    | 18(1)    | 17(1)    | 1(1)     | 4(1)     | 2(1)     |
| P(2)  | 16(1)    | 18(1)    | 17(1)    | 3(1)     | 4(1)     | 1(1)     |
| P(3)  | 20(1)    | 21(1)    | 20(1)    | 2(1)     | 5(1)     | -1(1)    |
| O(1)  | 35(1)    | 34(1)    | 38(1)    | -3(1)    | 7(1)     | 14(1)    |
| O(2)  | 54(1)    | 28(1)    | 47(1)    | -7(1)    | -5(1)    | -8(1)    |
| O(3)  | 37(1)    | 62(1)    | 22(1)    | 13(1)    | 5(1)     | 9(1)     |
| O(4)  | 34(1)    | 28(1)    | 37(1)    | -4(1)    | 10(1)    | 6(1)     |
| N(1)  | 25(1)    | 33(1)    | 24(1)    | 5(1)     | 6(1)     | -7(1)    |
| C(2A) | 20(1)    | 23(1)    | 26(1)    | 1(1)     | 3(1)     | 2(1)     |
| C(1)  | 34(1)    | 22(1)    | 21(1)    | 1(1)     | 5(1)     | 3(1)     |
| C(2)  | 36(1)    | 20(1)    | 27(1)    | 2(1)     | 4(1)     | 3(1)     |
| C(3)  | 23(1)    | 32(1)    | 24(1)    | 4(1)     | 9(1)     | 1(1)     |
| C(4)  | 22(1)    | 25(1)    | 20(1)    | -1(1)    | 5(1)     | -2(1)    |
| C(5)  | 18(1)    | 25(1)    | 17(1)    | 3(1)     | 4(1)     | 0(1)     |
| C(6)  | 20(1)    | 19(1)    | 22(1)    | 5(1)     | 6(1)     | 2(1)     |
| C(7)  | 25(1)    | 26(1)    | 37(1)    | 1(1)     | -1(1)    | 2(1)     |
| C(8)  | 23(1)    | 38(1)    | 45(1)    | 6(1)     | -1(1)    | 7(1)     |
| C(9)  | 30(1)    | 27(1)    | 39(1)    | 9(1)     | 10(1)    | 11(1)    |
| C(10) | 32(1)    | 22(1)    | 32(1)    | 2(1)     | 11(1)    | 5(1)     |
| C(11) | 24(1)    | 23(1)    | 24(1)    | 2(1)     | 6(1)     | 3(1)     |
| C(12) | 21(1)    | 27(1)    | 16(1)    | 0(1)     | 1(1)     | 2(1)     |
| C(13) | 36(1)    | 30(1)    | 28(1)    | 3(1)     | 8(1)     | -1(1)    |
| C(14) | 40(1)    | 47(2)    | 22(1)    | 7(1)     | 8(1)     | -1(1)    |
| C(15) | 36(1)    | 54(2)    | 19(1)    | -5(1)    | 7(1)     | 0(1)     |
| C(16) | 43(1)    | 38(1)    | 25(1)    | -7(1)    | 7(1)     | 6(1)     |
| C(17) | 35(1)    | 31(1)    | 20(1)    | 0(1)     | 5(1)     | 7(1)     |
| C(18) | 17(1)    | 21(1)    | 18(1)    | 0(1)     | 3(1)     | 1(1)     |

# Supplementary Material (ESI) for Chemical Communications  
# This journal is © The Royal Society of Chemistry 2005

|       |       |       |       |        |       |        |
|-------|-------|-------|-------|--------|-------|--------|
| C(19) | 24(1) | 19(1) | 31(1) | 4(1)   | 9(1)  | 1(1)   |
| C(20) | 23(1) | 25(1) | 36(1) | -1(1)  | 13(1) | -2(1)  |
| C(21) | 22(1) | 34(1) | 25(1) | -3(1)  | 4(1)  | 9(1)   |
| C(22) | 33(1) | 41(1) | 32(1) | 15(1)  | 11(1) | 17(1)  |
| C(23) | 28(1) | 35(1) | 27(1) | 13(1)  | 12(1) | 10(1)  |
| C(24) | 15(1) | 19(1) | 25(1) | 2(1)   | 4(1)  | 2(1)   |
| C(25) | 29(1) | 24(1) | 28(1) | 3(1)   | 14(1) | 3(1)   |
| C(26) | 31(1) | 19(1) | 42(1) | 6(1)   | 16(1) | 4(1)   |
| C(27) | 28(1) | 21(1) | 41(1) | -1(1)  | 5(1)  | -2(1)  |
| C(28) | 36(1) | 27(1) | 27(1) | -1(1)  | -2(1) | -2(1)  |
| C(29) | 27(1) | 26(1) | 23(1) | 4(1)   | 0(1)  | -3(1)  |
| C(30) | 38(1) | 31(1) | 35(1) | 12(1)  | 0(1)  | -10(1) |
| C(31) | 58(2) | 52(2) | 40(1) | 24(1)  | -8(1) | -24(1) |
| C(32) | 61(2) | 86(2) | 33(1) | 21(1)  | 2(1)  | -37(2) |
| C(33) | 44(2) | 89(2) | 28(1) | 5(1)   | 13(1) | -21(2) |
| C(34) | 27(1) | 57(2) | 28(1) | 0(1)   | 11(1) | -11(1) |
| C(35) | 48(2) | 31(1) | 70(2) | 23(1)  | 13(1) | 9(1)   |
| C(36) | 51(2) | 35(1) | 45(1) | 6(1)   | 0(1)  | -13(1) |
| C(37) | 25(1) | 71(2) | 43(1) | 3(1)   | 7(1)  | -10(1) |
| C(38) | 41(1) | 56(2) | 39(1) | -10(1) | 22(1) | -2(1)  |

---

Table 16. Hydrogen coordinates ( $\times 10^4$ ) and isotropic displacement parameters ( $\text{\AA}^2 \times 10^{-3}$ ) for  $[\text{Co}_2(\text{CO})_4(\mu\text{-dppm})(\mu\text{-}\eta^1, \eta^2\text{-P(TMP)=CH}_2)]$  (**4b**).

|        | x      | y        | z        | U(eq) |
|--------|--------|----------|----------|-------|
| H(2A)  | 502(7) | 4530(20) | 3064(9)  | 23(6) |
| H(2)   | 232(8) | 3250(20) | 3038(10) | 28(6) |
| H(5B)  | 1844   | 5873     | 2405     | 24    |
| H(5A)  | 2042   | 4481     | 2411     | 24    |
| H(7)   | 382    | 4985     | 1615     | 37    |
| H(8)   | -81    | 6747     | 1435     | 44    |
| H(9)   | 140    | 8618     | 1934     | 38    |
| H(10)  | 824    | 8708     | 2619     | 33    |
| H(11)  | 1301   | 6963     | 2781     | 28    |
| H(13)  | 1243   | 5659     | 1208     | 37    |
| H(14)  | 1377   | 5005     | 314      | 44    |
| H(15)  | 1488   | 2900     | 140      | 43    |
| H(16)  | 1490   | 1430     | 874      | 42    |
| H(17)  | 1360   | 2072     | 1774     | 34    |
| H(19)  | 2819   | 5638     | 2913     | 29    |
| H(20)  | 3526   | 4706     | 2968     | 32    |
| H(21)  | 3734   | 2959     | 3564     | 32    |
| H(22)  | 3235   | 2153     | 4101     | 41    |
| H(23)  | 2519   | 3055     | 4030     | 35    |
| H(25)  | 2241   | 7444     | 2771     | 31    |
| H(26)  | 2415   | 9493     | 3088     | 35    |
| H(27)  | 2453   | 10051    | 4053     | 37    |
| H(28)  | 2303   | 8547     | 4712     | 38    |
| H(29)  | 2117   | 6506     | 4399     | 31    |
| H(31B) | 992    | -383     | 4984     | 63    |
| H(31A) | 1241   | 927      | 5162     | 63    |
| H(32B) | 648    | 731      | 5644     | 73    |
| H(32A) | 293    | 481      | 5041     | 73    |
| H(33B) | 771    | 2777     | 5355     | 63    |

# Supplementary Material (ESI) for Chemical Communications  
# This journal is © The Royal Society of Chemistry 2005

|        |      |      |      |    |
|--------|------|------|------|----|
| H(33A) | 241  | 2577 | 5326 | 63 |
| H(35C) | 1562 | 1306 | 4310 | 59 |
| H(35B) | 1306 | 674  | 3712 | 59 |
| H(35A) | 1462 | -169 | 4283 | 59 |
| H(36C) | 454  | 368  | 3525 | 54 |
| H(36B) | 268  | -31  | 4088 | 54 |
| H(36A) | 669  | -813 | 3906 | 54 |
| H(37C) | -122 | 1452 | 4225 | 56 |
| H(37B) | -147 | 2615 | 3788 | 56 |
| H(37A) | -313 | 2773 | 4387 | 56 |
| H(38C) | 292  | 4515 | 4119 | 52 |
| H(38B) | 717  | 4476 | 4659 | 52 |
| H(38A) | 213  | 4510 | 4772 | 52 |

---



Table 17. Atomic coordinates ( $\times 10^4$ ) and equivalent isotropic displacement parameters ( $\text{\AA}^2 \times 10^3$ ) for  $[\text{Mn}_2(\text{CO})_8(\mu\text{-}\{\text{P}(\text{N}^i\text{Pr}_2)=\text{N}-\text{N}(=\text{CPh}_2)\})]$  (**5**).  $U(\text{eq})$  is defined as one third of the trace of the orthogonalized  $U^{ij}$  tensor.

|       | x       | y       | z       | U(eq) |
|-------|---------|---------|---------|-------|
| Mn(1) | 4841(1) | 3493(1) | 3292(1) | 18(1) |
| Mn(2) | 2984(1) | 3100(1) | 1334(1) | 17(1) |
| P(1)  | 4116(1) | 4374(1) | 2387(1) | 16(1) |
| O(1)  | 6582(1) | 3350(1) | 2225(1) | 44(1) |
| O(2)  | 5246(1) | 2118(1) | 4016(1) | 39(1) |
| O(3)  | 6533(1) | 4065(1) | 5260(1) | 37(1) |
| O(4)  | 2809(1) | 3545(1) | 4027(1) | 28(1) |
| O(5)  | 2279(1) | 2148(1) | 2660(1) | 35(1) |
| O(6)  | 4002(1) | 3837(1) | -26(1)  | 30(1) |
| O(7)  | 1182(1) | 2560(1) | -608(1) | 37(1) |
| O(8)  | 4709(1) | 2107(1) | 1246(1) | 34(1) |
| N(1)  | 4834(1) | 5033(1) | 2318(1) | 19(1) |
| N(2)  | 2743(1) | 4509(1) | 1722(1) | 18(1) |
| N(3)  | 2076(1) | 3925(1) | 1555(1) | 17(1) |
| C(1)  | 5918(2) | 3406(1) | 2628(1) | 27(1) |
| C(2)  | 5084(2) | 2643(1) | 3722(1) | 26(1) |
| C(3)  | 5882(2) | 3841(1) | 4493(1) | 25(1) |
| C(4)  | 3571(2) | 3523(1) | 3727(1) | 21(1) |
| C(5)  | 2518(2) | 2540(1) | 2184(1) | 24(1) |
| C(6)  | 3611(2) | 3591(1) | 518(1)  | 21(1) |
| C(7)  | 1847(2) | 2781(1) | 150(1)  | 24(1) |
| C(8)  | 4040(2) | 2485(1) | 1300(1) | 24(1) |
| C(9)  | 995(1)  | 4009(1) | 1515(1) | 17(1) |
| C(10) | 550(1)  | 4647(1) | 1736(1) | 19(1) |
| C(11) | 1138(2) | 4992(1) | 2670(1) | 26(1) |
| C(12) | 698(2)  | 5584(1) | 2843(2) | 30(1) |
| C(13) | -324(2) | 5846(1) | 2095(2) | 28(1) |
| C(14) | -916(2) | 5504(1) | 1176(1) | 28(1) |
| C(15) | -496(2) | 4905(1) | 1000(1) | 23(1) |

# Supplementary Material (ESI) for Chemical Communications  
# This journal is © The Royal Society of Chemistry 2005

|       |          |         |         |       |
|-------|----------|---------|---------|-------|
| C(16) | 134(1)   | 3456(1) | 1259(1) | 20(1) |
| C(17) | -50(2)   | 3130(1) | 2079(1) | 28(1) |
| C(18) | -889(2)  | 2637(1) | 1861(2) | 35(1) |
| C(19) | -1564(2) | 2474(1) | 827(2)  | 36(1) |
| C(20) | -1400(2) | 2802(1) | 8(2)    | 33(1) |
| C(21) | -554(2)  | 3296(1) | 217(1)  | 26(1) |
| C(22) | 6139(1)  | 5066(1) | 2968(1) | 21(1) |
| C(23) | 6863(2)  | 5202(1) | 2292(2) | 35(1) |
| C(24) | 6389(2)  | 5545(1) | 3871(2) | 37(1) |
| C(25) | 4288(2)  | 5638(1) | 1713(1) | 22(1) |
| C(26) | 3403(2)  | 5958(1) | 2116(1) | 28(1) |
| C(27) | 3766(2)  | 5515(1) | 531(1)  | 26(1) |
| O(1A) | -474(2)  | 5022(2) | 4693(2) | 32(1) |
| C(1A) | 367(6)   | 5475(4) | 5332(6) | 39(2) |
| C(2A) | -195(4)  | 6146(2) | 5128(4) | 45(1) |
| C(3A) | 21(5)    | 4388(4) | 4747(6) | 33(2) |
| C(4A) | -944(4)  | 3926(2) | 4105(4) | 41(1) |

---

Table 18. Bond lengths [Å] and angles [°] for  $[\text{Mn}_2(\text{CO})_8(\mu\text{-}\{\text{P}(\text{N}^i\text{Pr}_2)=\text{N}-\text{N}(=\text{CPh}_2)\})]$  (**5**).

---

|             |            |
|-------------|------------|
| Mn(1)-C(3)  | 1.8037(18) |
| Mn(1)-C(2)  | 1.8320(18) |
| Mn(1)-C(4)  | 1.8449(18) |
| Mn(1)-C(1)  | 1.8525(19) |
| Mn(1)-P(1)  | 2.1845(5)  |
| Mn(1)-Mn(2) | 2.8945(4)  |
| Mn(2)-C(8)  | 1.8103(18) |
| Mn(2)-C(7)  | 1.8116(17) |
| Mn(2)-C(6)  | 1.8631(17) |
| Mn(2)-C(5)  | 1.8646(18) |
| Mn(2)-N(3)  | 2.1034(13) |
| P(1)-N(2)   | 1.5931(14) |
| P(1)-N(1)   | 1.6309(14) |
| O(1)-C(1)   | 1.138(2)   |
| O(2)-C(2)   | 1.144(2)   |
| O(3)-C(3)   | 1.147(2)   |
| O(4)-C(4)   | 1.141(2)   |
| O(5)-C(5)   | 1.140(2)   |
| O(6)-C(6)   | 1.139(2)   |
| O(7)-C(7)   | 1.142(2)   |
| O(8)-C(8)   | 1.144(2)   |
| N(1)-C(22)  | 1.497(2)   |
| N(1)-C(25)  | 1.504(2)   |
| N(2)-N(3)   | 1.4176(18) |
| N(3)-C(9)   | 1.301(2)   |
| C(9)-C(10)  | 1.492(2)   |
| C(9)-C(16)  | 1.492(2)   |
| C(10)-C(15) | 1.395(2)   |
| C(10)-C(11) | 1.401(2)   |
| C(11)-C(12) | 1.383(3)   |
| C(12)-C(13) | 1.386(3)   |
| C(13)-C(14) | 1.382(3)   |
| C(14)-C(15) | 1.388(2)   |

# Supplementary Material (ESI) for Chemical Communications  
# This journal is © The Royal Society of Chemistry 2005

|             |          |
|-------------|----------|
| C(16)-C(17) | 1.393(2) |
| C(16)-C(21) | 1.395(2) |
| C(17)-C(18) | 1.387(3) |
| C(18)-C(19) | 1.384(3) |
| C(19)-C(20) | 1.382(3) |
| C(20)-C(21) | 1.394(3) |
| C(22)-C(23) | 1.517(2) |
| C(22)-C(24) | 1.519(2) |
| C(25)-C(27) | 1.521(2) |
| C(25)-C(26) | 1.523(3) |
| O(1A)-C(1A) | 1.416(8) |
| O(1A)-C(3A) | 1.425(7) |
| C(1A)-C(2A) | 1.517(8) |
| C(3A)-C(4A) | 1.507(9) |

|                  |            |
|------------------|------------|
| C(3)-Mn(1)-C(2)  | 96.47(8)   |
| C(3)-Mn(1)-C(4)  | 94.35(8)   |
| C(2)-Mn(1)-C(4)  | 88.94(8)   |
| C(3)-Mn(1)-C(1)  | 95.99(8)   |
| C(2)-Mn(1)-C(1)  | 90.41(8)   |
| C(4)-Mn(1)-C(1)  | 169.65(8)  |
| C(3)-Mn(1)-P(1)  | 100.50(6)  |
| C(2)-Mn(1)-P(1)  | 162.80(6)  |
| C(4)-Mn(1)-P(1)  | 86.98(5)   |
| C(1)-Mn(1)-P(1)  | 90.62(6)   |
| C(3)-Mn(1)-Mn(2) | 172.01(6)  |
| C(2)-Mn(1)-Mn(2) | 90.37(6)   |
| C(4)-Mn(1)-Mn(2) | 81.62(5)   |
| C(1)-Mn(1)-Mn(2) | 88.06(6)   |
| P(1)-Mn(1)-Mn(2) | 72.502(15) |
| C(8)-Mn(2)-C(7)  | 91.87(8)   |
| C(8)-Mn(2)-C(6)  | 85.11(8)   |
| C(7)-Mn(2)-C(6)  | 90.27(8)   |
| C(8)-Mn(2)-C(5)  | 88.01(8)   |
| C(7)-Mn(2)-C(5)  | 91.60(8)   |

# Supplementary Material (ESI) for Chemical Communications  
# This journal is © The Royal Society of Chemistry 2005

|                   |            |
|-------------------|------------|
| C(6)-Mn(2)-C(5)   | 172.93(7)  |
| C(8)-Mn(2)-N(3)   | 168.08(7)  |
| C(7)-Mn(2)-N(3)   | 99.01(6)   |
| C(6)-Mn(2)-N(3)   | 89.98(6)   |
| C(5)-Mn(2)-N(3)   | 96.46(6)   |
| C(8)-Mn(2)-Mn(1)  | 84.64(5)   |
| C(7)-Mn(2)-Mn(1)  | 175.00(6)  |
| C(6)-Mn(2)-Mn(1)  | 92.99(5)   |
| C(5)-Mn(2)-Mn(1)  | 84.72(5)   |
| N(3)-Mn(2)-Mn(1)  | 84.78(4)   |
| N(2)-P(1)-N(1)    | 106.69(7)  |
| N(2)-P(1)-Mn(1)   | 125.49(5)  |
| N(1)-P(1)-Mn(1)   | 127.71(5)  |
| C(22)-N(1)-C(25)  | 116.02(12) |
| C(22)-N(1)-P(1)   | 118.04(10) |
| C(25)-N(1)-P(1)   | 125.79(11) |
| N(3)-N(2)-P(1)    | 110.77(10) |
| C(9)-N(3)-N(2)    | 113.45(13) |
| C(9)-N(3)-Mn(2)   | 132.24(11) |
| N(2)-N(3)-Mn(2)   | 114.21(9)  |
| O(1)-C(1)-Mn(1)   | 179.6(2)   |
| O(2)-C(2)-Mn(1)   | 178.31(17) |
| O(3)-C(3)-Mn(1)   | 179.23(18) |
| O(4)-C(4)-Mn(1)   | 177.93(14) |
| O(5)-C(5)-Mn(2)   | 172.89(16) |
| O(6)-C(6)-Mn(2)   | 173.48(15) |
| O(7)-C(7)-Mn(2)   | 175.98(16) |
| O(8)-C(8)-Mn(2)   | 177.45(16) |
| N(3)-C(9)-C(10)   | 122.77(14) |
| N(3)-C(9)-C(16)   | 120.84(14) |
| C(10)-C(9)-C(16)  | 116.38(13) |
| C(15)-C(10)-C(11) | 118.74(15) |
| C(15)-C(10)-C(9)  | 119.18(14) |
| C(11)-C(10)-C(9)  | 122.06(14) |
| C(12)-C(11)-C(10) | 120.27(16) |

# Supplementary Material (ESI) for Chemical Communications  
# This journal is © The Royal Society of Chemistry 2005

|                   |            |
|-------------------|------------|
| C(11)-C(12)-C(13) | 120.65(17) |
| C(14)-C(13)-C(12) | 119.39(17) |
| C(13)-C(14)-C(15) | 120.62(16) |
| C(14)-C(15)-C(10) | 120.29(16) |
| C(17)-C(16)-C(21) | 119.55(16) |
| C(17)-C(16)-C(9)  | 118.99(15) |
| C(21)-C(16)-C(9)  | 121.26(15) |
| C(18)-C(17)-C(16) | 120.23(17) |
| C(19)-C(18)-C(17) | 120.14(18) |
| C(20)-C(19)-C(18) | 120.00(18) |
| C(19)-C(20)-C(21) | 120.40(17) |
| C(20)-C(21)-C(16) | 119.65(17) |
| N(1)-C(22)-C(23)  | 111.63(13) |
| N(1)-C(22)-C(24)  | 110.98(14) |
| C(23)-C(22)-C(24) | 112.93(16) |
| N(1)-C(25)-C(27)  | 111.63(13) |
| N(1)-C(25)-C(26)  | 112.50(14) |
| C(27)-C(25)-C(26) | 112.77(14) |
| C(1A)-O(1A)-C(3A) | 112.2(4)   |
| O(1A)-C(1A)-C(2A) | 108.3(5)   |
| O(1A)-C(3A)-C(4A) | 109.0(4)   |

---

Symmetry transformations used to generate equivalent atoms:

Table 19. Anisotropic displacement parameters ( $\text{\AA}^2 \times 10^3$ ) for  $[\text{Mn}_2(\text{CO})_8(\mu\text{-}\{\text{P}(\text{N}^i\text{Pr}_2)=\text{N}-\text{N}(\text{=CPh}_2)\})]$   
 (5). The anisotropic displacement factor exponent takes the form:  $-2\pi^2[ h^2 a^{*2}U^{11} + \dots + 2 h k a^* b^* U^{12} ]$

|       | $U^{11}$ | $U^{22}$ | $U^{33}$ | $U^{23}$ | $U^{13}$ | $U^{12}$ |
|-------|----------|----------|----------|----------|----------|----------|
| Mn(1) | 16(1)    | 15(1)    | 21(1)    | 2(1)     | 5(1)     | 1(1)     |
| Mn(2) | 17(1)    | 14(1)    | 20(1)    | -1(1)    | 6(1)     | 0(1)     |
| P(1)  | 15(1)    | 14(1)    | 18(1)    | 0(1)     | 4(1)     | -1(1)    |
| O(1)  | 35(1)    | 46(1)    | 60(1)    | -7(1)    | 29(1)    | 1(1)     |
| O(2)  | 44(1)    | 22(1)    | 51(1)    | 11(1)    | 17(1)    | 8(1)     |
| O(3)  | 32(1)    | 45(1)    | 24(1)    | 0(1)     | 0(1)     | -6(1)    |
| O(4)  | 27(1)    | 33(1)    | 28(1)    | -2(1)    | 13(1)    | -3(1)    |
| O(5)  | 39(1)    | 26(1)    | 44(1)    | 7(1)     | 21(1)    | -3(1)    |
| O(6)  | 35(1)    | 28(1)    | 33(1)    | 4(1)     | 20(1)    | 1(1)     |
| O(7)  | 29(1)    | 43(1)    | 34(1)    | -18(1)   | 7(1)     | -4(1)    |
| O(8)  | 32(1)    | 23(1)    | 46(1)    | -3(1)    | 15(1)    | 8(1)     |
| N(1)  | 16(1)    | 16(1)    | 21(1)    | 1(1)     | 2(1)     | -1(1)    |
| N(2)  | 15(1)    | 15(1)    | 22(1)    | 0(1)     | 5(1)     | -2(1)    |
| N(3)  | 16(1)    | 15(1)    | 17(1)    | 0(1)     | 4(1)     | -1(1)    |
| C(1)  | 25(1)    | 21(1)    | 35(1)    | 0(1)     | 10(1)    | 3(1)     |
| C(2)  | 25(1)    | 22(1)    | 31(1)    | 3(1)     | 9(1)     | 3(1)     |
| C(3)  | 22(1)    | 25(1)    | 25(1)    | 6(1)     | 6(1)     | 2(1)     |
| C(4)  | 23(1)    | 17(1)    | 20(1)    | 2(1)     | 4(1)     | -1(1)    |
| C(5)  | 24(1)    | 20(1)    | 27(1)    | -2(1)    | 10(1)    | 1(1)     |
| C(6)  | 21(1)    | 17(1)    | 24(1)    | -2(1)    | 7(1)     | 2(1)     |
| C(7)  | 22(1)    | 23(1)    | 29(1)    | -3(1)    | 11(1)    | 2(1)     |
| C(8)  | 25(1)    | 18(1)    | 26(1)    | -1(1)    | 7(1)     | -1(1)    |
| C(9)  | 15(1)    | 18(1)    | 17(1)    | 2(1)     | 3(1)     | 0(1)     |
| C(10) | 16(1)    | 18(1)    | 24(1)    | 0(1)     | 9(1)     | 0(1)     |
| C(11) | 19(1)    | 28(1)    | 27(1)    | -3(1)    | 6(1)     | 3(1)     |
| C(12) | 26(1)    | 30(1)    | 34(1)    | -12(1)   | 12(1)    | -2(1)    |
| C(13) | 27(1)    | 21(1)    | 42(1)    | -1(1)    | 20(1)    | 3(1)     |
| C(14) | 23(1)    | 26(1)    | 33(1)    | 6(1)     | 9(1)     | 8(1)     |
| C(15) | 18(1)    | 25(1)    | 25(1)    | 0(1)     | 6(1)     | 1(1)     |
| C(16) | 14(1)    | 18(1)    | 25(1)    | 0(1)     | 5(1)     | 1(1)     |

# Supplementary Material (ESI) for Chemical Communications  
# This journal is © The Royal Society of Chemistry 2005

|       |       |       |       |        |       |       |
|-------|-------|-------|-------|--------|-------|-------|
| C(17) | 25(1) | 28(1) | 29(1) | 3(1)   | 9(1)  | -3(1) |
| C(18) | 29(1) | 30(1) | 46(1) | 8(1)   | 15(1) | -6(1) |
| C(19) | 24(1) | 25(1) | 56(1) | -1(1)  | 9(1)  | -8(1) |
| C(20) | 24(1) | 26(1) | 38(1) | -7(1)  | 1(1)  | -5(1) |
| C(21) | 23(1) | 23(1) | 28(1) | -2(1)  | 5(1)  | -2(1) |
| C(22) | 16(1) | 19(1) | 24(1) | 0(1)   | 3(1)  | -2(1) |
| C(23) | 19(1) | 48(1) | 36(1) | 11(1)  | 9(1)  | -3(1) |
| C(24) | 28(1) | 32(1) | 38(1) | -13(1) | -1(1) | -2(1) |
| C(25) | 21(1) | 15(1) | 27(1) | 4(1)   | 4(1)  | -2(1) |
| C(26) | 31(1) | 17(1) | 33(1) | 0(1)   | 9(1)  | 3(1)  |
| C(27) | 25(1) | 24(1) | 25(1) | 6(1)   | 7(1)  | -1(1) |
| O(1A) | 26(1) | 30(2) | 36(1) | -1(1)  | 7(1)  | 3(1)  |
| C(1A) | 26(4) | 52(5) | 37(3) | 3(3)   | 9(3)  | -6(3) |
| C(2A) | 42(3) | 41(3) | 56(3) | -10(2) | 23(2) | -9(2) |
| C(3A) | 24(3) | 41(4) | 33(2) | 7(2)   | 9(3)  | 8(3)  |
| C(4A) | 38(2) | 37(2) | 49(2) | -2(2)  | 17(2) | 4(2)  |

---



Table 20. Hydrogen coordinates ( $\times 10^4$ ) and isotropic displacement parameters ( $\text{\AA}^2 \times 10^{-3}$ ) for  $[\text{Mn}_2(\text{CO})_8(\mu\text{-}\{\text{P}(\text{N}^i\text{Pr}_2)=\text{N}-\text{N}(\text{=CPh}_2)\})]$  (**5**).

|        | x     | y    | z    | U(eq) |
|--------|-------|------|------|-------|
| H(11)  | 1841  | 4819 | 3187 | 31    |
| H(12)  | 1101  | 5814 | 3480 | 35    |
| H(13)  | -615  | 6255 | 2212 | 34    |
| H(14)  | -1616 | 5682 | 661  | 34    |
| H(15)  | -923  | 4669 | 375  | 28    |
| H(17)  | 401   | 3245 | 2789 | 33    |
| H(18)  | -1000 | 2410 | 2423 | 42    |
| H(19)  | -2141 | 2137 | 680  | 44    |
| H(20)  | -1867 | 2690 | -701 | 39    |
| H(21)  | -447  | 3521 | -348 | 31    |
| H(22)  | 6382  | 4627 | 3289 | 25    |
| H(23C) | 6666  | 5636 | 1977 | 42    |
| H(23B) | 6678  | 4875 | 1732 | 42    |
| H(23A) | 7714  | 5183 | 2731 | 42    |
| H(24C) | 5808  | 5482 | 4206 | 44    |
| H(24B) | 6327  | 5990 | 3599 | 44    |
| H(24A) | 7194  | 5472 | 4391 | 44    |
| H(25)  | 4953  | 5956 | 1841 | 26    |
| H(26C) | 3748  | 5979 | 2888 | 33    |
| H(26B) | 2668  | 5702 | 1892 | 33    |
| H(26A) | 3225  | 6399 | 1828 | 33    |
| H(27C) | 3062  | 5236 | 358  | 31    |
| H(27B) | 4362  | 5298 | 316  | 31    |
| H(27A) | 3539  | 5929 | 157  | 31    |
| H(1A2) | 1092  | 5470 | 5159 | 47    |
| H(1A1) | 597   | 5360 | 6086 | 47    |
| H(2A3) | -865  | 6159 | 5366 | 54    |
| H(2A2) | -482  | 6241 | 4371 | 54    |
| H(2A1) | 399   | 6471 | 5514 | 54    |

# Supplementary Material (ESI) for Chemical Communications  
# This journal is © The Royal Society of Chemistry 2005

|        |       |      |      |    |
|--------|-------|------|------|----|
| H(3A2) | 362   | 4240 | 5489 | 40 |
| H(3A1) | 667   | 4397 | 4467 | 40 |
| H(4A3) | -1229 | 4053 | 3360 | 49 |
| H(4A2) | -1607 | 3943 | 4352 | 49 |
| H(4A1) | -626  | 3483 | 4185 | 49 |

---
